# Supplementary material
Source: HighWire-hosted journal article supplement (https://bjgpopen.org/highwire/filestream/6055/field_highwire_adjunct_files/0/Jones_BJGPO.2022.0139_Supp.pdf)
Supplement: Jones_BJGPO.2022.0139_Supp.pdf [file Jones_BJGPO.2022.0139_Supp.pdf]

Supplementary Figure S1. Flow chart showing exclusions of tests and test panels from our analysis

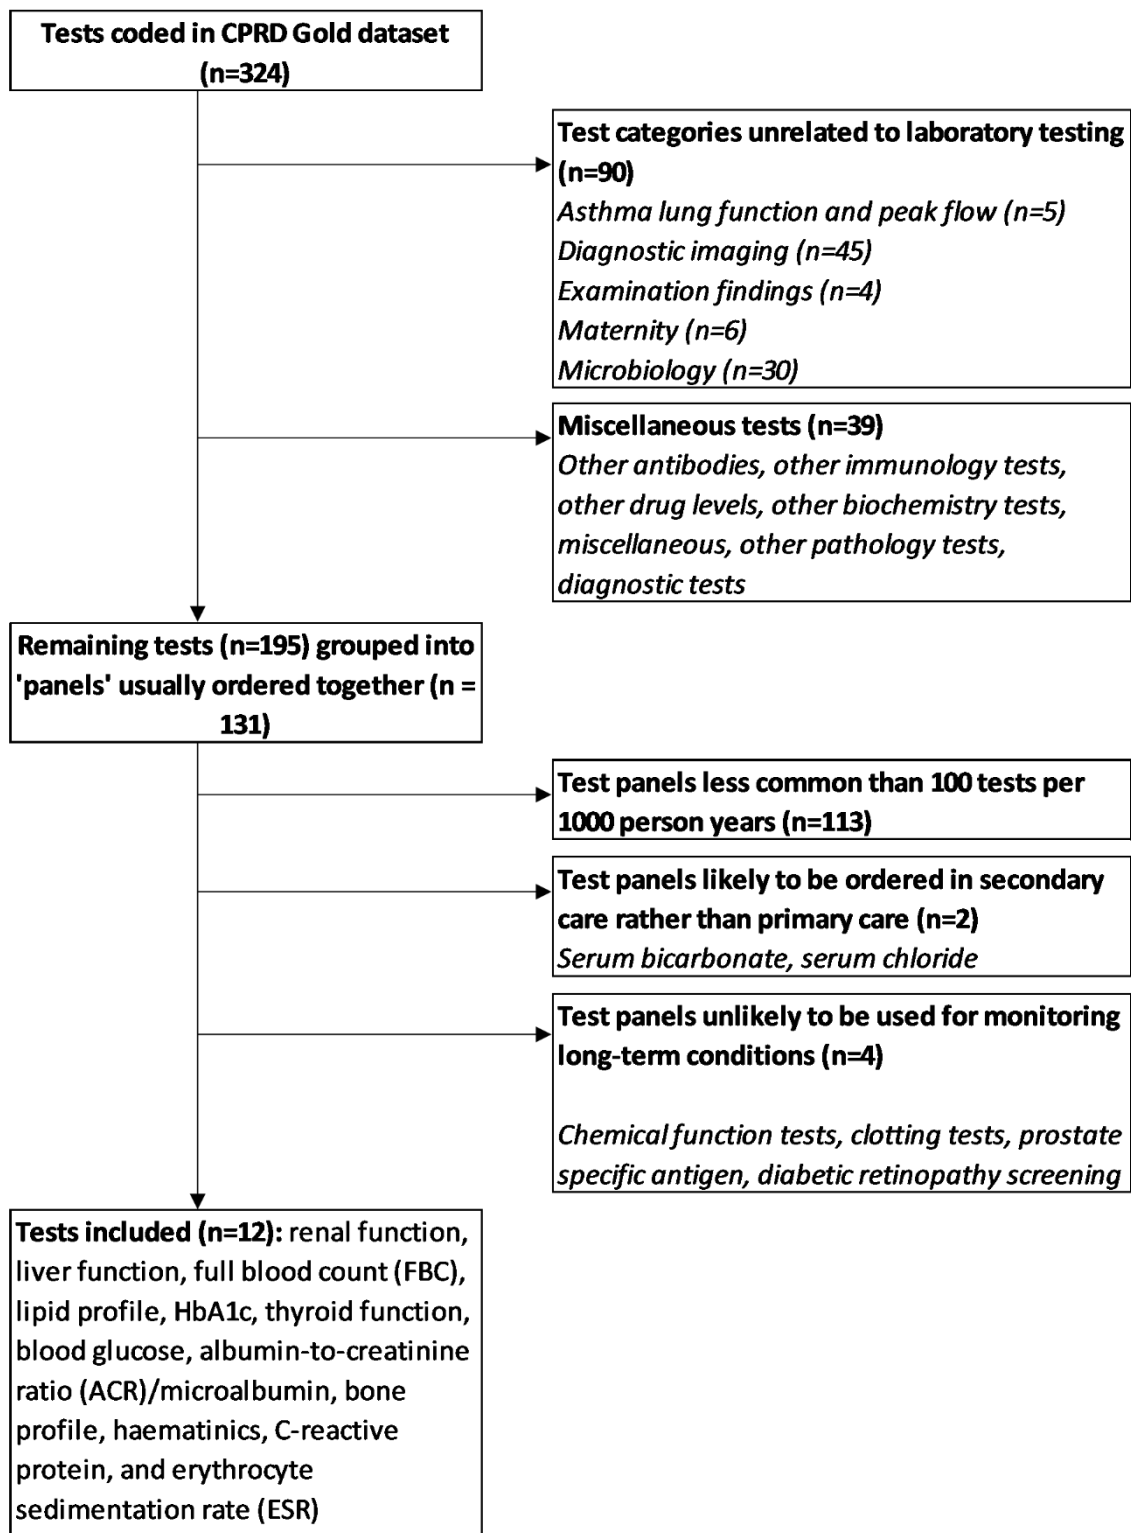

**Supplementary Table S1. Code list for hypertension**

| <b>CPRD medical code</b> | <b>Read code</b> | <b>Description</b>                                     |
|--------------------------|------------------|--------------------------------------------------------|
| 30776                    | 6629             | Hypertension:follow-up default                         |
| 103690                   | 38G3.00          | Hyperten, abnorm renal/liver funct, stroke, BLED score |
| 109611                   | 661M600          | Hypertension self-management plan agreed               |
| 4444                     | 662..12          | Hypertension monitoring                                |
| 18482                    | 662c.00          | Hypertension six month review                          |
| 19070                    | 662d.00          | Hypertension annual review                             |
| 21826                    | 662F.00          | Hypertension treatm. started                           |
| 13188                    | 662G.00          | Hypertensive treatm.changed                            |
| 3425                     | 662O.00          | On treatment for hypertension                          |
| 13186                    | 662P.00          | Hypertension monitoring                                |
| 102406                   | 662P000          | Hypertension 9 month review                            |
| 71433                    | 66b2.00          | Hypertension monitoring not required                   |
| 85944                    | 7Q01.00          | High cost hypertension drugs                           |
| 101649                   | 7Q01y00          | Other specified high cost hypertension drugs           |
| 12680                    | 8CR4.00          | Hypertension clinical management plan                  |
| 22333                    | 8I3N.00          | Hypertension treatment refused                         |
| 15423                    | 9OD..00          | Hypertension screen admin.                             |
| 16477                    | 9ODZ.00          | Hypertension screen admin. NOS                         |
| 5215                     | 9OI..00          | Hypertension monitoring admin.                         |
| 27525                    | 9OI..11          | Hypertension clinic admin.                             |
| 28828                    | 9OI3.00          | Hyperten.monitor offer default                         |
| 31117                    | 9OI4.00          | Hypertens.monitor.1st letter                           |
| 31127                    | 9OI5.00          | Hypertens.monitor 2nd letter                           |
| 31175                    | 9OI6.00          | Hypertens.monitor 3rd letter                           |
| 66645                    | 9OI9.00          | Hypertens.monitor deleted                              |
| 36305                    | 9OIA.00          | Hypertension monitor.chk done                          |
| 24127                    | 9OIA.11          | Hypertension monitored                                 |
| 34192                    | 9OIZ.00          | Hypertens.monitoring admin.NOS                         |

|        |         |                                                              |
|--------|---------|--------------------------------------------------------------|
| 6702   | F421300 | Hypertensive retinopathy                                     |
| 204    | G2...00 | Hypertensive disease                                         |
| 799    | G20..00 | Essential hypertension                                       |
| 351    | G20..11 | High blood pressure                                          |
| 107704 | G20..12 | Primary hypertension                                         |
| 15377  | G200.00 | Malignant essential hypertension                             |
| 1894   | G201.00 | Benign essential hypertension                                |
| 4372   | G202.00 | Systolic hypertension                                        |
| 83473  | G203.00 | Diastolic hypertension                                       |
| 10818  | G20z.00 | Essential hypertension NOS                                   |
| 3712   | G20z.11 | Hypertension NOS                                             |
| 16292  | G21..00 | Hypertensive heart disease                                   |
| 31464  | G21z.00 | Hypertensive heart disease NOS                               |
| 61166  | G21z000 | Hypertensive heart disease NOS without CCF                   |
| 62718  | G21z100 | Hypertensive heart disease NOS with CCF                      |
| 16173  | G21zz00 | Hypertensive heart disease NOS                               |
| 4668   | G22..00 | Hypertensive renal disease                                   |
| 32423  | G222.00 | Hypertensive renal disease with renal failure                |
| 15106  | G22z.00 | Hypertensive renal disease NOS                               |
| 63466  | G23..00 | Hypertensive heart and renal disease                         |
| 21837  | G232.00 | Hypertensive heart&renal dis wth (congestive) heart failure  |
| 28684  | G233.00 | Hypertensive heart and renal disease with renal failure      |
| 57987  | G234.00 | Hyperten heart&renal dis+both(congestv)heart and renal fail  |
| 68659  | G23z.00 | Hypertensive heart and renal disease NOS                     |
| 34744  | G244.00 | Hypertension secondary to endocrine disorders                |
| 105371 | G25..00 | Stage 1 hypertension (NICE - Nat Ins for Hth Clin Excl 2011) |
| 105316 | G25..11 | Stage 1 hypertension                                         |
| 105989 | G26..00 | Severe hypertension (Nat Inst for Health Clinical Ex 2011)   |
| 105487 | G26..11 | Severe hypertension                                          |
| 105480 | G27..00 | Hypertension resistant to drug therapy                       |

|        |         |                                                              |
|--------|---------|--------------------------------------------------------------|
| 105274 | G28..00 | Stage 2 hypertension (NICE - Nat Ins for Hth Clin Excl 2011) |
| 7057   | G2z..00 | Hypertensive disease NOS                                     |
| 3979   | G672.00 | Hypertensive encephalopathy                                  |
| 31816  | G672.11 | Hypertensive crisis                                          |
| 18057  | 8B26.00 | Antihypertensive therapy                                     |
| 8732   | G2...11 | BP - hypertensive disease                                    |
| 63000  | G231.00 | Benign hypertensive heart and renal disease                  |
| 52427  | G211.00 | Benign hypertensive heart disease                            |
| 105938 | G211z00 | Benign hypertensive heart disease NOS                        |
| 52127  | G211100 | Benign hypertensive heart disease with CCF                   |
| 61660  | G211000 | Benign hypertensive heart disease without CCF                |
| 43935  | G221.00 | Benign hypertensive renal disease                            |
| 8857   | G21z011 | Cardiomegaly - hypertensive                                  |
| 34281  | 9N4L.00 | DNA - Did not attend hypertension clinic                     |
| 10976  | 9h32.00 | Excepted from hypertension qual indicators: Informed dissent |
| 10961  | 9h31.00 | Excepted from hypertension qual indicators: Patient unsuit   |
| 34108  | 9h3..00 | Exception reporting: hypertension quality indicators         |
| 16565  | 6627    | Good hypertension control                                    |
| 110631 | 661N600 | Hypertension self-management plan review                     |
| 67232  | G230.00 | Malignant hypertensive heart and renal disease               |
| 50157  | G210.00 | Malignant hypertensive heart disease                         |
| 103046 | G210z00 | Malignant hypertensive heart disease NOS                     |
| 72668  | G210100 | Malignant hypertensive heart disease with CCF                |
| 95334  | G210000 | Malignant hypertensive heart disease without CCF             |
| 39649  | G220.00 | Malignant hypertensive renal disease                         |
| 18590  | 662b.00 | Moderate hypertension control                                |
| 96743  | L122300 | Other pre-exist hypertension in preg/childb/puerp-not deliv  |
| 72030  | L122100 | Other pre-existing hypertension in preg/childb/puerp - deliv |
| 62432  | L122z00 | Other pre-existing hypertension in preg/childb/puerp NOS     |
| 73586  | L122000 | Other pre-existing hypertension in preg/childb/puerp unspec  |

|        |         |                                                             |
|--------|---------|-------------------------------------------------------------|
| 66567  | L122.00 | Other pre-existing hypertension in preg/childbirth/puerp    |
| 18765  | G2y..00 | Other specified hypertensive disease                        |
| 11056  | 8BL0.00 | Patient on maximal tolerated antihypertensive therapy       |
| 27511  | 6628    | Poor hypertension control                                   |
| 44549  | L128.00 | Pre-exist hypertension compl preg childbirth and puerperium |
| 5513   | 8HT5.00 | Referral to hypertension clinic                             |
| 29310  | G22z.11 | Renal hypertension                                          |
| 57288  | G241.00 | Secondary benign hypertension                               |
| 51635  | G241z00 | Secondary benign hypertension NOS                           |
| 25371  | G241000 | Secondary benign renovascular hypertension                  |
| 7329   | G24..00 | Secondary hypertension                                      |
| 16059  | G24z.00 | Secondary hypertension NOS                                  |
| 42229  | G24zz00 | Secondary hypertension NOS                                  |
| 31755  | G240.00 | Secondary malignant hypertension                            |
| 73293  | G240z00 | Secondary malignant hypertension NOS                        |
| 59383  | G240000 | Secondary malignant renovascular hypertension               |
| 31387  | G24z000 | Secondary renovascular hypertension NOS                     |
| 4344   | 9N03.00 | Seen in hypertension clinic                                 |
| 27634  | 9N1y200 | Seen in hypertension clinic                                 |
| 109771 | 662P100 | Telehealth hypertension monitoring                          |
| 99259  | 662q.00 | Trial reduction of antihypertensive therapy                 |
| 95359  | 662r.00 | Trial withdrawal of antihypertensive therapy                |
| 106279 | 8IA5.00 | Trial withdrawal of antihypertensive therapy declined       |
| 97533  | Gyu2100 | [X]Hypertension secondary to other renal disorders          |
| 69753  | Gyu2.00 | [X]Hypertensive diseases                                    |
| 102458 | Gyu2000 | [X]Other secondary hypertension                             |

**Supplementary Table S2. Code list for type 2 diabetes**

| <b>CPRD medical code</b> | <b>Read code</b> | <b>Description</b>                                         |
|--------------------------|------------------|------------------------------------------------------------|
| 22967                    | 2BBF.00          | Retinal abnormality - diabetes related                     |
| 101881                   | 2BBr.00          | Impaired vision due to diabetic retinopathy                |
| 27921                    | 2G51000          | Foot abnormality - diabetes related                        |
| 18056                    | 2G5C.00          | Foot abnormality - diabetes related                        |
| 32770                    | 44V3.00          | Glucose tol. test diabetic                                 |
| 13071                    | 66AI.00          | Diabetic - good control                                    |
| 2378                     | 66AJ.00          | Diabetic - poor control                                    |
| 9013                     | 66AJ.11          | Unstable diabetes                                          |
| 22023                    | 66AJz00          | Diabetic - poor control NOS                                |
| 24363                    | 8A13.00          | Diabetic stabilisation                                     |
| 12213                    | 8BL2.00          | Patient on maximal tolerated therapy for diabetes          |
| 711                      | C10..00          | Diabetes mellitus                                          |
| 38986                    | C100.00          | Diabetes mellitus with no mention of complication          |
| 14803                    | C100100          | Diabetes mellitus, adult onset, no mention of complication |
| 506                      | C100112          | Non-insulin dependent diabetes mellitus                    |
| 50972                    | C100z00          | Diabetes mellitus NOS with no mention of complication      |
| 1682                     | C101.00          | Diabetes mellitus with ketoacidosis                        |
| 54856                    | C101100          | Diabetes mellitus, adult onset, with ketoacidosis          |
| 38617                    | C101y00          | Other specified diabetes mellitus with ketoacidosis        |
| 42505                    | C101z00          | Diabetes mellitus NOS with ketoacidosis                    |
| 21482                    | C102.00          | Diabetes mellitus with hyperosmolar coma                   |
| 43139                    | C102100          | Diabetes mellitus, adult onset, with hyperosmolar coma     |
| 72345                    | C102z00          | Diabetes mellitus NOS with hyperosmolar coma               |
| 15690                    | C103.00          | Diabetes mellitus with ketoacidotic coma                   |
| 68843                    | C103100          | Diabetes mellitus, adult onset, with ketoacidotic coma     |
| 59288                    | C103y00          | Other specified diabetes mellitus with coma                |
| 65062                    | C103z00          | Diabetes mellitus NOS with ketoacidotic coma               |
| 16502                    | C104.00          | Diabetes mellitus with renal manifestation                 |

|       |         |                                                              |
|-------|---------|--------------------------------------------------------------|
| 2475  | C104.11 | Diabetic nephropathy                                         |
| 35105 | C104100 | Diabetes mellitus, adult onset, with renal manifestation     |
| 13279 | C104y00 | Other specified diabetes mellitus with renal complications   |
| 35107 | C104z00 | Diabetes mellitus with nephropathy NOS                       |
| 33254 | C105.00 | Diabetes mellitus with ophthalmic manifestation              |
| 41389 | C105100 | Diabetes mellitus, adult onset, + ophthalmic manifestation   |
| 47377 | C105y00 | Other specified diabetes mellitus with ophthalmic complicatn |
| 34283 | C105z00 | Diabetes mellitus NOS with ophthalmic manifestation          |
| 16230 | C106.00 | Diabetes mellitus with neurological manifestation            |
| 59903 | C106.11 | Diabetic amyotrophy                                          |
| 7795  | C106.12 | Diabetes mellitus with neuropathy                            |
| 16491 | C106.13 | Diabetes mellitus with polyneuropathy                        |
| 39317 | C106100 | Diabetes mellitus, adult onset, + neurological manifestation |
| 61523 | C106y00 | Other specified diabetes mellitus with neurological comps    |
| 22573 | C106z00 | Diabetes mellitus NOS with neurological manifestation        |
| 35399 | C107.00 | Diabetes mellitus with peripheral circulatory disorder       |
| 32403 | C107.11 | Diabetes mellitus with gangrene                              |
| 32556 | C107.12 | Diabetes with gangrene                                       |
| 63357 | C107100 | Diabetes mellitus, adult, + peripheral circulatory disorder  |
| 33807 | C107200 | Diabetes mellitus, adult with gangrene                       |
| 65025 | C107z00 | Diabetes mellitus NOS with peripheral circulatory disorder   |
| 46290 | C108y00 | Other specified diabetes mellitus with multiple comps        |
| 64449 | C108z00 | Unspecified diabetes mellitus with multiple complications    |
| 4513  | C109.00 | Non-insulin dependent diabetes mellitus                      |
| 5884  | C109.11 | NIDDM - Non-insulin dependent diabetes mellitus              |
| 17859 | C109.12 | Type 2 diabetes mellitus                                     |
| 18219 | C109.13 | Type II diabetes mellitus                                    |
| 52303 | C109000 | Non-insulin-dependent diabetes mellitus with renal comps     |
| 50225 | C109011 | Type II diabetes mellitus with renal complications           |
| 18209 | C109012 | Type 2 diabetes mellitus with renal complications            |

|        |         |                                                              |
|--------|---------|--------------------------------------------------------------|
| 50429  | C109100 | Non-insulin-dependent diabetes mellitus with ophthalm comps  |
| 59725  | C109111 | Type II diabetes mellitus with ophthalmic complications      |
| 70316  | C109112 | Type 2 diabetes mellitus with ophthalmic complications       |
| 55842  | C109200 | Non-insulin-dependent diabetes mellitus with neuro comps     |
| 67905  | C109211 | Type II diabetes mellitus with neurological complications    |
| 45919  | C109212 | Type 2 diabetes mellitus with neurological complications     |
| 62146  | C109300 | Non-insulin-dependent diabetes mellitus with multiple comps  |
| 108005 | C109312 | Type 2 diabetes mellitus with multiple complications         |
| 34912  | C109400 | Non-insulin dependent diabetes mellitus with ulcer           |
| 55075  | C109411 | Type II diabetes mellitus with ulcer                         |
| 65704  | C109412 | Type 2 diabetes mellitus with ulcer                          |
| 40401  | C109500 | Non-insulin dependent diabetes mellitus with gangrene        |
| 62107  | C109511 | Type II diabetes mellitus with gangrene                      |
| 46150  | C109512 | Type 2 diabetes mellitus with gangrene                       |
| 17262  | C109600 | Non-insulin-dependent diabetes mellitus with retinopathy     |
| 58604  | C109611 | Type II diabetes mellitus with retinopathy                   |
| 42762  | C109612 | Type 2 diabetes mellitus with retinopathy                    |
| 8403   | C109700 | Non-insulin dependent diabetes mellitus - poor control       |
| 24458  | C109711 | Type II diabetes mellitus - poor control                     |
| 45913  | C109712 | Type 2 diabetes mellitus - poor control                      |
| 29979  | C109900 | Non-insulin-dependent diabetes mellitus without complication |
| 109103 | C109911 | Type II diabetes mellitus without complication               |
| 105784 | C109912 | Type 2 diabetes mellitus without complication                |
| 72320  | C109A00 | Non-insulin dependent diabetes mellitus with mononeuropathy  |
| 50813  | C109A11 | Type II diabetes mellitus with mononeuropathy                |
| 45467  | C109B00 | Non-insulin dependent diabetes mellitus with polyneuropathy  |
| 47409  | C109B11 | Type II diabetes mellitus with polyneuropathy                |
| 59365  | C109C00 | Non-insulin dependent diabetes mellitus with nephropathy     |
| 64571  | C109C11 | Type II diabetes mellitus with nephropathy                   |
| 24836  | C109C12 | Type 2 diabetes mellitus with nephropathy                    |



|        |         |                                                             |
|--------|---------|-------------------------------------------------------------|
| 43785  | C109D00 | Non-insulin dependent diabetes mellitus with hypoglyca coma |
| 56268  | C109D11 | Type II diabetes mellitus with hypoglycaemic coma           |
| 61071  | C109D12 | Type 2 diabetes mellitus with hypoglycaemic coma            |
| 69278  | C109E00 | Non-insulin depend diabetes mellitus with diabetic cataract |
| 48192  | C109E11 | Type II diabetes mellitus with diabetic cataract            |
| 44779  | C109E12 | Type 2 diabetes mellitus with diabetic cataract             |
| 54899  | C109F11 | Type II diabetes mellitus with peripheral angiopathy        |
| 60699  | C109F12 | Type 2 diabetes mellitus with peripheral angiopathy         |
| 24693  | C109G00 | Non-insulin dependent diabetes mellitus with arthropathy    |
| 18143  | C109G11 | Type II diabetes mellitus with arthropathy                  |
| 49869  | C109G12 | Type 2 diabetes mellitus with arthropathy                   |
| 47816  | C109H11 | Type II diabetes mellitus with neuropathic arthropathy      |
| 66965  | C109H12 | Type 2 diabetes mellitus with neuropathic arthropathy       |
| 18278  | C109J00 | Insulin treated Type 2 diabetes mellitus                    |
| 37648  | C109J11 | Insulin treated non-insulin dependent diabetes mellitus     |
| 18264  | C109J12 | Insulin treated Type II diabetes mellitus                   |
| 36633  | C109K00 | Hyperosmolar non-ketotic state in type 2 diabetes mellitus  |
| 758    | C10F.00 | Type 2 diabetes mellitus                                    |
| 22884  | C10F.11 | Type II diabetes mellitus                                   |
| 18777  | C10F000 | Type 2 diabetes mellitus with renal complications           |
| 57278  | C10F011 | Type II diabetes mellitus with renal complications          |
| 47321  | C10F100 | Type 2 diabetes mellitus with ophthalmic complications      |
| 100964 | C10F111 | Type II diabetes mellitus with ophthalmic complications     |
| 34268  | C10F200 | Type 2 diabetes mellitus with neurological complications    |
| 98616  | C10F211 | Type II diabetes mellitus with neurological complications   |
| 65267  | C10F300 | Type 2 diabetes mellitus with multiple complications        |
| 43227  | C10F311 | Type II diabetes mellitus with multiple complications       |
| 49074  | C10F400 | Type 2 diabetes mellitus with ulcer                         |
| 91646  | C10F411 | Type II diabetes mellitus with ulcer                        |
| 12736  | C10F500 | Type 2 diabetes mellitus with gangrene                      |

|        |         |                                                             |
|--------|---------|-------------------------------------------------------------|
| 104323 | C10F511 | Type II diabetes mellitus with gangrene                     |
| 18496  | C10F600 | Type 2 diabetes mellitus with retinopathy                   |
| 49655  | C10F611 | Type II diabetes mellitus with retinopathy                  |
| 25627  | C10F700 | Type 2 diabetes mellitus - poor control                     |
| 47315  | C10F711 | Type II diabetes mellitus - poor control                    |
| 47954  | C10F900 | Type 2 diabetes mellitus without complication               |
| 53392  | C10F911 | Type II diabetes mellitus without complication              |
| 62674  | C10FA00 | Type 2 diabetes mellitus with mononeuropathy                |
| 95351  | C10FA11 | Type II diabetes mellitus with mononeuropathy               |
| 18425  | C10FB00 | Type 2 diabetes mellitus with polyneuropathy                |
| 50527  | C10FB11 | Type II diabetes mellitus with polyneuropathy               |
| 12640  | C10FC00 | Type 2 diabetes mellitus with nephropathy                   |
| 102201 | C10FC11 | Type II diabetes mellitus with nephropathy                  |
| 46917  | C10FD00 | Type 2 diabetes mellitus with hypoglycaemic coma            |
| 98723  | C10FD11 | Type II diabetes mellitus with hypoglycaemic coma           |
| 44982  | C10FE00 | Type 2 diabetes mellitus with diabetic cataract             |
| 93727  | C10FE11 | Type II diabetes mellitus with diabetic cataract            |
| 37806  | C10FF00 | Type 2 diabetes mellitus with peripheral angiopathy         |
| 104639 | C10FF11 | Type II diabetes mellitus with peripheral angiopathy        |
| 59253  | C10FG00 | Type 2 diabetes mellitus with arthropathy                   |
| 103902 | C10FG11 | Type II diabetes mellitus with arthropathy                  |
| 35385  | C10FH00 | Type 2 diabetes mellitus with neuropathic arthropathy       |
| 109197 | C10FH11 | Type II diabetes mellitus with neuropathic arthropathy      |
| 1407   | C10FJ00 | Insulin treated Type 2 diabetes mellitus                    |
| 64668  | C10FJ11 | Insulin treated Type II diabetes mellitus                   |
| 34450  | C10FK00 | Hyperosmolar non-ketotic state in type 2 diabetes mellitus  |
| 107701 | C10FK11 | Hyperosmolar non-ketotic state in type II diabetes mellitus |
| 26054  | C10FL00 | Type 2 diabetes mellitus with persistent proteinuria        |
| 60796  | C10FL11 | Type II diabetes mellitus with persistent proteinuria       |
| 18390  | C10FM00 | Type 2 diabetes mellitus with persistent microalbuminuria   |

|        |         |                                                            |
|--------|---------|------------------------------------------------------------|
| 85991  | C10FM11 | Type II diabetes mellitus with persistent microalbuminuria |
| 32627  | C10FN00 | Type 2 diabetes mellitus with ketoacidosis                 |
| 106528 | C10FN11 | Type II diabetes mellitus with ketoacidosis                |
| 51756  | C10FP00 | Type 2 diabetes mellitus with ketoacidotic coma            |
| 106061 | C10FP11 | Type II diabetes mellitus with ketoacidotic coma           |
| 25591  | C10FQ00 | Type 2 diabetes mellitus with exudative maculopathy        |
| 63690  | C10FR00 | Type 2 diabetes mellitus with gastroparesis                |
| 43857  | C10M.00 | Lipoatrophic diabetes mellitus                             |
| 107603 | C10P.00 | Diabetes mellitus in remission                             |
| 108360 | C10P000 | Type I diabetes mellitus in remission                      |
| 33343  | C10y.00 | Diabetes mellitus with other specified manifestation       |
| 63371  | C10y100 | Diabetes mellitus, adult, + other specified manifestation  |
| 10098  | C10yy00 | Other specified diabetes mellitus with other spec comps    |
| 70821  | C10yz00 | Diabetes mellitus NOS with other specified manifestation   |
| 45491  | C10z.00 | Diabetes mellitus with unspecified complication            |
| 63762  | C10z100 | Diabetes mellitus, adult onset, + unspecified complication |
| 64283  | C10zy00 | Other specified diabetes mellitus with unspecified comps   |
| 64357  | C10zz00 | Diabetes mellitus NOS with unspecified complication        |
| 52212  | Cyu2.00 | [X]Diabetes mellitus                                       |
| 41686  | Cyu2000 | [X]Other specified diabetes mellitus                       |
| 100292 | Cyu2300 | [X]Unspecified diabetes mellitus with renal complications  |
| 17067  | F171100 | Autonomic neuropathy due to diabetes                       |
| 44033  | F345000 | Diabetic mononeuritis multiplex                            |
| 17247  | F35z000 | Diabetic mononeuritis NOS                                  |
| 31790  | F372.00 | Polyneuropathy in diabetes                                 |
| 5002   | F372.11 | Diabetic polyneuropathy                                    |
| 2342   | F372.12 | Diabetic neuropathy                                        |
| 48078  | F372000 | Acute painful diabetic neuropathy                          |
| 35785  | F372100 | Chronic painful diabetic neuropathy                        |
| 24571  | F372200 | Asymptomatic diabetic neuropathy                           |

|        |         |                                                       |
|--------|---------|-------------------------------------------------------|
| 39420  | F381300 | Myasthenic syndrome due to diabetic amyotrophy        |
| 2340   | F381311 | Diabetic amyotrophy                                   |
| 37315  | F3y0.00 | Diabetic mononeuropathy                               |
| 1323   | F420.00 | Diabetic retinopathy                                  |
| 7069   | F420000 | Background diabetic retinopathy                       |
| 3286   | F420100 | Proliferative diabetic retinopathy                    |
| 2986   | F420200 | Preproliferative diabetic retinopathy                 |
| 10099  | F420300 | Advanced diabetic maculopathy                         |
| 3837   | F420400 | Diabetic maculopathy                                  |
| 47584  | F420500 | Advanced diabetic retinal disease                     |
| 10755  | F420600 | Non proliferative diabetic retinopathy                |
| 30477  | F420700 | High risk proliferative diabetic retinopathy          |
| 65463  | F420800 | High risk non proliferative diabetic retinopathy      |
| 11626  | F420z00 | Diabetic retinopathy NOS                              |
| 17313  | F440700 | Diabetic iritis                                       |
| 10659  | F464000 | Diabetic cataract                                     |
| 34152  | G73y000 | Diabetic peripheral angiopathy                        |
| 2471   | K01x100 | Nephrotic syndrome in diabetes mellitus               |
| 105302 | K08yA00 | Proteinuric diabetic nephropathy                      |
| 107881 | K08yA11 | Clinical diabetic nephropathy                         |
| 106360 | K27y700 | Erectile dysfunction due to diabetes mellitus         |
| 99628  | Kyu0300 | [X]Glomerular disorders in diabetes mellitus          |
| 50609  | L180600 | Pre-existing diabetes mellitus, non-insulin-dependent |
| 55431  | L180X00 | Pre-existing diabetes mellitus, unspecified           |
| 7328   | M037200 | Cellulitis in diabetic foot                           |
| 24327  | M271000 | Ischaemic ulcer diabetic foot                         |
| 11663  | M271100 | Neuropathic diabetic ulcer - foot                     |
| 9881   | M271200 | Mixed diabetic ulcer - foot                           |
| 18142  | N030000 | Diabetic cheiroarthropathy                            |
| 57333  | N030011 | Diabetic cheiropathy                                  |

|        |         |                                                              |
|--------|---------|--------------------------------------------------------------|
| 27891  | N030100 | Diabetic Charcot arthropathy                                 |
| 53634  | R054200 | [D]Gangrene of toe in diabetic                               |
| 31053  | R054300 | [D]Widespread diabetic foot gangrene                         |
| 11848  | C314.11 | Renal diabetes                                               |
| 1684   | 66A4.00 | Diabetic on oral treatment                                   |
| 7563   | 66A3.00 | Diabetic on diet only                                        |
| 11551  | C10B.00 | Diabetes mellitus induced by steroids                        |
| 14889  | C100111 | Maturity onset diabetes                                      |
| 22487  | C10N.00 | Secondary diabetes mellitus                                  |
| 25041  | ZC2CA00 | Dietary advice for type II diabetes                          |
| 26108  | C10B000 | Steroid induced diabetes mellitus without complication       |
| 28769  | 66AV.00 | Diabetic on insulin and oral treatment                       |
| 31310  | C108900 | Insulin dependent diabetes maturity onset                    |
| 32193  | C11y000 | Steroid induced diabetes                                     |
| 46624  | C10C.11 | Maturity onset diabetes in youth                             |
| 51697  | C10G.00 | Secondary pancreatic diabetes mellitus                       |
| 56803  | C107400 | NIDDM with peripheral circulatory disorder                   |
| 59991  | C10D.11 | Maturity onset diabetes in youth type 2                      |
| 61122  | C10H.00 | Diabetes mellitus induced by non-steroid drugs               |
| 67212  | C10H000 | DM induced by non-steroid drugs without complication         |
| 83532  | 66Ao.00 | Diabetes type 2 review                                       |
| 93529  | 9OLK.00 | DESMOND diabetes structured education programme completed    |
| 93657  | 8Hj4.00 | Referral to DESMOND diabetes structured education programme  |
| 94383  | C10N000 | Secondary diabetes mellitus without complication             |
| 95093  | 8I83.00 | Did not complete DESMOND diabetes structured educat program  |
| 95159  | 9NiD.00 | Did not attend DESMOND diabetes structured education program |
| 96506  | C10G000 | Secondary pancreatic diabetes mellitus without complication  |
| 97849  | C10E912 | Insulin dependent diabetes maturity onset                    |
| 101801 | 66At100 | Type II diabetic dietary review                              |
| 102611 | 66At111 | Type 2 diabetic dietary review                               |

|        |         |                                                        |
|--------|---------|--------------------------------------------------------|
| 109865 | C109B12 | Type 2 diabetes mellitus with polyneuropathy           |
| 110344 | 66o2.00 | Diabetic on non-insulin injectable medication          |
| 110379 | 66o5.00 | Diabetic on oral treatment and glucagon-like peptide 1 |
| 111483 | 66o6.00 | Diabetic on insulin and glucagon-like peptide 1        |

**Supplementary Table S3. Code list for chronic kidney disease (CKD) stage 3 or above**

| <b>CPRD medical code</b> | <b>Read code</b> | <b>Description</b>                                           |
|--------------------------|------------------|--------------------------------------------------------------|
| 12720                    | 1Z1..00          | Chronic renal impairment                                     |
| 12566                    | 1Z12.00          | Chronic kidney disease stage 3                               |
| 12479                    | 1Z13.00          | Chronic kidney disease stage 4                               |
| 12585                    | 1Z14.00          | Chronic kidney disease stage 5                               |
| 94965                    | 1Z15.00          | Chronic kidney disease stage 3A                              |
| 95179                    | 1Z16.00          | Chronic kidney disease stage 3B                              |
| 94793                    | 1Z1B.00          | Chronic kidney disease stage 3 with proteinuria              |
| 95123                    | 1Z1C.00          | Chronic kidney disease stage 3 without proteinuria           |
| 95408                    | 1Z1D.00          | Chronic kidney disease stage 3A with proteinuria             |
| 95175                    | 1Z1E.00          | Chronic kidney disease stage 3A without proteinuria          |
| 95178                    | 1Z1F.00          | Chronic kidney disease stage 3B with proteinuria             |
| 95177                    | 1Z1G.00          | Chronic kidney disease stage 3B without proteinuria          |
| 95122                    | 1Z1H.00          | Chronic kidney disease stage 4 with proteinuria              |
| 95406                    | 1Z1J.00          | Chronic kidney disease stage 4 without proteinuria           |
| 95508                    | 1Z1K.00          | Chronic kidney disease stage 5 with proteinuria              |
| 95405                    | 1Z1L.00          | Chronic kidney disease stage 5 without proteinuria           |
| 108766                   | 661M200          | Chronic kidney disease self-management plan agreed           |
| 19473                    | 66i..00          | Chronic kidney disease monitoring                            |
| 30735                    | 6AA..00          | Chronic kidney disease annual review                         |
| 40100                    | 9hE1.00          | Exc chronic kidney disease quality indicators: Inform dissen |
| 71271                    | 90t..00          | Chronic kidney disease monitoring administration             |
| 30739                    | 90t0.00          | Chronic kidney disease monitoring first letter               |
| 72962                    | 90t1.00          | Chronic kidney disease monitoring second letter              |
| 72964                    | 90t2.00          | Chronic kidney disease monitoring third letter               |
| 88494                    | 90t3.00          | Chronic kidney disease monitoring verbal invite              |
| 69679                    | 90t4.00          | Chronic kidney disease monitoring telephone invite           |
| 25394                    | D215000          | Anaemia secondary to chronic renal failure                   |

|        |         |                                                     |
|--------|---------|-----------------------------------------------------|
| 512    | K05..00 | Chronic renal failure                               |
| 104981 | K05..13 | Chronic kidney disease                              |
| 104619 | K053.00 | Chronic kidney disease stage 3                      |
| 104963 | K054.00 | Chronic kidney disease stage 4                      |
| 105151 | K055.00 | Chronic kidney disease stage 5                      |
| 100205 | K0E..00 | Acute-on-chronic renal failure                      |
| 53940  | Kyu2100 | [X]Other chronic renal failure                      |
| 89332  | 90t5.00 | Predicted stage chronic kidney disease              |
| 95145  | 1Z1B.11 | CKD stage 3 with proteinuria                        |
| 95188  | 1Z1C.11 | CKD stage 3 without proteinuria                     |
| 95571  | 1Z1D.11 | CKD stage 3A with proteinuria                       |
| 95176  | 1Z1E.11 | CKD stage 3A without proteinuria                    |
| 95180  | 1Z1F.11 | CKD stage 3B with proteinuria                       |
| 100633 | 1Z1G.11 | CKD stage 3B without proteinuria                    |
| 99312  | 1Z1H.11 | CKD stage 4 with proteinuria                        |
| 97587  | 1Z1J.11 | CKD stage 4 without proteinuria                     |
| 99160  | 1Z1K.11 | CKD stage 5 with proteinuria                        |
| 97683  | 1Z1L.11 | CKD stage 5 without proteinuria                     |
| 109804 | 1Z1T.00 | CKD with GFR category G3a & albuminuria category A1 |
| 109805 | 1Z1V.00 | CKD with GFR category G3a & albuminuria category A2 |
| 109905 | 1Z1W.00 | CKD with GFR category G3a & albuminuria category A3 |
| 109963 | 1Z1X.00 | CKD with GFR category G3b & albuminuria category A1 |
| 109657 | 1Z1Y.00 | CKD with GFR category G3b & albuminuria category A2 |
| 109990 | 1Z1Z.00 | CKD with GFR category G3b & albuminuria category A3 |
| 109980 | 1Z1a.00 | CKD with GFR category G4 & albuminuria category A1  |
| 109904 | 1Z1b.00 | CKD with GFR category G4 & albuminuria category A2  |
| 110626 | 1Z1c.00 | CKD with GFR category G4 & albuminuria category A3  |
| 110133 | 1Z1d.00 | CKD with GFR category G5 & albuminuria category A1  |
| 109981 | 1Z1e.00 | CKD with GFR category G5 & albuminuria category A2  |
| 110467 | 1Z1f.00 | CKD with GFR category G5 & albuminuria category A3  |



## Supplementary Table S4. Characteristics of people included and excluded from the study cohort

| Cohort                      | Included        | < 1 year followup | > 52 tests per year |
|-----------------------------|-----------------|-------------------|---------------------|
| <i>N</i> (% of cohort)      | 933,907 (79.4%) | 235,489 (20%)     | 15,976 (1.4%)       |
| Women (%)                   | 475,028 (50.9%) | 119,836 (50.9%)   | 8,612 (53.9%)       |
| Average age (SD)            | 69 years (14.1) | 69 years (16.2)   | 72 years (14.3)     |
| <i>Region</i>               |                 |                   |                     |
| North East                  | 6,231 (0.7%)    | 7,458 (3.2%)      | 147 (0.9%)          |
| North West                  | 92,285 (9.9%)   | 25,448 (10.8%)    | 1,245 (7.8%)        |
| Yorkshire & the Humber      | 8,392 (0.9%)    | 3,639 (1.5%)      | 181 (1.1%)          |
| East Midlands               | 1,552 (0.2%)    | 4,042 (1.7%)      | 056 (0.4%)          |
| West Midlands               | 80,959 (8.7%)   | 27,136 (11.5%)    | 882 (5.5%)          |
| East of England             | 49,304 (5.3%)   | 12,055 (5.1%)     | 567 (3.5%)          |
| South West                  | 66,696 (7.1%)   | 31,832 (13.5%)    | 1,782 (11.2%)       |
| South Central               | 98,201 (10.5%)  | 21,396 (9.1%)     | 1,504 (9.4%)        |
| London                      | 95,507 (10.2%)  | 31,278 (13.3%)    | 903 (5.7%)          |
| South East Coast            | 104,946 (11.2%) | 26,643 (11.3%)    | 1,108 (6.9%)        |
| Northern Ireland            | 40,539 (4.3%)   | 4,689 (2%)        | 1,561 (9.8%)        |
| Scotland                    | 135,156 (14.5%) | 18,562 (7.9%)     | 4,354 (27.3%)       |
| Wales                       | 154,139 (16.5%) | 21,311 (9%)       | 1,686 (10.6%)       |
| <i>Deprivation Quintile</i> |                 |                   |                     |
| 1 - Least                   | 111,908 (23.6%) | 31,484 (20.4%)    | 1,317 (19.6%)       |
| 2                           | 104,013 (22%)   | 34,316 (22.2%)    | 1,474 (21.9%)       |
| 3                           | 101,630 (21.5%) | 32,115 (20.8%)    | 1,644 (24.4%)       |
| 4                           | 87,265 (18.4%)  | 30,708 (19.9%)    | 1,310 (19.5%)       |
| 5 - Most                    | 68,773 (14.5%)  | 25,972 (16.8%)    | 983 (14.6%)         |
| Missing                     | 460,318 (49.3%) | 80,894 (34.4%)    | 9,248 (57.9%)       |
| <i>Ethnicity</i>            |                 |                   |                     |
| White                       | 360,296 (92%)   | 117,434 (90.8%)   | 5,845 (93.7%)       |
| Black                       | 9,646 (2.5%)    | 3,511 (2.7%)      | 115 (1.8%)          |
| Asian                       | 13,958 (3.6%)   | 5,294 (4.1%)      | 200 (3.2%)          |
| Other                       | 7,757 (2%)      | 3,068 (2.4%)      | 079 (1.3%)          |
| Missing                     | 542,250 (58.1%) | 106,182 (45.1%)   | 9,737 (60.9%)       |

**Supplementary Table S5. Grouping of tests into test panels**

| <b>Panel</b>                      | <b>Test</b>                       |
|-----------------------------------|-----------------------------------|
| Acid phosphatase                  | Acid phosphatase                  |
| ACR / Microalbumin                | Albumin creatinine ratio          |
| ACR / Microalbumin                | Urine Biochemistry                |
| ACR / Microalbumin                | Urine microalbumin                |
| Adrenal autoantibodies            | Adrenal autoantibodies            |
| Amylase                           | Amylase                           |
| Anti mitochondrial antibodies     | Anti mitochondrial antibodies     |
| Anti nuclear antibodies           | Anti nuclear antibodies           |
| Anti smooth muscle autoantibodies | Anti smooth muscle autoantibodies |
| Antistreptolysin o titre          | Antistreptolysin o titre          |
| Biochemical screening tests       | Biochemical screening tests       |
| Blood alcohol level               | Blood alcohol level               |
| Blood group antibodies            | Blood group antibodies            |
| Blood lead level                  | Blood lead level                  |
| Blood trace elements / vitamins   | Blood trace elements / vitamins   |
| Bone Profile                      | Bone studies                      |
| Bone Profile                      | Calcium                           |
| Bone Profile                      | Calcium adjusted                  |
| Bone Profile                      | Serum inorganic phosphate         |
| C Reactive protein                | C Reactive protein                |
| CAP (RAST)                        | CAP (RAST)                        |
| Carbamazepine                     | Carbamazepine                     |
| Cardiac enzymes                   | Cardiac enzymes                   |
| Chemical function tests           | Chemical function tests           |
| Clotting Tests                    | Clotting tests                    |
| Clotting Tests                    | INR                               |
| Clotting Tests                    | Partial thromboplastin time       |
| Clotting Tests                    | Prothrombin time                  |

|                                |                                |
|--------------------------------|--------------------------------|
| Clotting Tests                 | Thrombin time                  |
| Complement tests               | Complement tests               |
| Creatine phosphokinase level   | Creatine phosphokinase level   |
| Creatinine clearance           | Creatinine clearance           |
| DNA binding autoantibodies     | DNA binding autoantibodies     |
| Digoxin blood level            | Digoxin blood level            |
| E2 prostaglandin               | E2 prostaglandin               |
| Enzymes/specific protein       | Enzymes/specific protein       |
| Erythrocyte sedimentation rate | Erythrocyte sedimentation rate |
| FBC                            | Basophil count                 |
| FBC                            | Differential white cell count  |
| FBC                            | Eosinophil count               |
| FBC                            | Full blood count               |
| FBC                            | Haemoglobin                    |
| FBC                            | Lymphocyte count               |
| FBC                            | MCH Hb Concentration           |
| FBC                            | Mean corpuscular haemoglobin   |
| FBC                            | Mean corpuscular volume        |
| FBC                            | Monocyte count                 |
| FBC                            | Neutrophil count               |
| FBC                            | Packed cell volume             |
| FBC                            | Platelets                      |
| FBC                            | RBC red blood cell size        |
| FBC                            | Red blood cell count           |
| FBC                            | Total White Blood cell count   |
| Feto-placental hormones        | Feto-placental hormones        |
| Film report                    | Film report                    |
| Fructosamine                   | Fructosamine                   |
| Gastrointestinal hormones      | Gastrointestinal hormones      |
| Glandular fever test           | Glandular fever test           |

|                              |                              |
|------------------------------|------------------------------|
| Glucose                      | Blood glucose                |
| Glucose                      | Fasting glucose              |
| Glucose                      | Glucose tolerance test       |
| Gonadotrophin                | Gonadotrophin                |
| Guthrie test                 | Guthrie test                 |
| HIV test                     | HIV test                     |
| Haematinics                  | B12 & Folate level           |
| Haematinics                  | B12 levels                   |
| Haematinics                  | Folate level                 |
| Haematinics                  | RBC - folate                 |
| Haematinics                  | Serum ferritin               |
| Haematology screening tests  | Haematology screening tests  |
| Haemoglobin variants         | Haemoglobin variants         |
| HbA1c - diabetic control     | HbA1c - diabetic control     |
| Hepatitis B Antibody         | Hepatitis B Antibody         |
| Hepatitis a test             | Hepatitis a test             |
| Human chorionic gonadotropin | Human chorionic gonadotropin |
| Immuno electrophoresis       | Immuno electrophoresis       |
| Immunoglobulin               | Immunoglobulin               |
| Immunology screening tests   | Immunology screening tests   |
| Iron kinetics                | Iron kinetics                |
| LE cells                     | LE cells                     |
| Lactate dehydrogenase        | Lactate dehydrogenase        |
| Legionella antibody test     | Legionella antibody test     |
| Lipid Profile                | Blood lipids                 |
| Lipid Profile                | HDL/LDL ratio                |
| Lipid Profile                | High density lipoprotein     |
| Lipid Profile                | Low density lipoprotein      |
| Lipid Profile                | Serum cholesterol            |
| Lipid Profile                | Triglycerides                |

|                              |                               |
|------------------------------|-------------------------------|
| Lipoprotein electrophoresis  | Lipoprotein electrophoresis   |
| Lithium levels               | Lithium levels                |
| Liver Function Tests         | Alanine aminotransferase      |
| Liver Function Tests         | Albumin                       |
| Liver Function Tests         | Alkaline phosphatase          |
| Liver Function Tests         | Aspartate aminotransferase    |
| Liver Function Tests         | Bilirubin                     |
| Liver Function Tests         | Gamma glutamyl transpeptidase |
| Liver Function Tests         | Liver enzymes                 |
| Liver Function Tests         | Liver function tests          |
| Liver Function Tests         | Serum globin                  |
| Liver Function Tests         | Total protein                 |
| Methotrexate                 | Methotrexate                  |
| Other Lab Result Information | Other Lab Result Information  |
| Other laboratory tests       | Other laboratory tests        |
| Parietal cell autoantibodes  | Parietal cell autoantibodes   |
| Phenobarbitone               | Phenobarbitone                |
| Phenytoin                    | Phenytoin                     |
| Plasma electrophoresis       | Plasma electrophoresis        |
| Plasma viscosity             | Plasma viscosity              |
| Prolactin level              | Prolactin level               |
| Prostate specific antigen    | Prostate specific antigen     |
| Prostatic acid phosphatase   | Prostatic acid phosphatase    |
| Red blood cell clumping      | Red blood cell clumping       |
| Red blood cell colour        | Red blood cell colour         |
| Red blood cell shape         | Red blood cell shape          |
| Red blood cells enzymes      | Red blood cells enzymes       |
| Renal function tests         | Glomerular Filtration Rate    |
| Renal function tests         | Potassium                     |
| Renal function tests         | Serum creatinine              |

|                                    |                                    |
|------------------------------------|------------------------------------|
| Renal function tests               | Serum electrolytes                 |
| Renal function tests               | Sodium                             |
| Renal function tests               | Urea - blood                       |
| Renal function tests               | Urea and electrolytes              |
| Reticulocytes                      | Reticulocytes                      |
| Rheumatoid factor                  | Rheumatoid factor                  |
| Rubella test                       | Rubella test                       |
| SH-antigen (hepatitis b) test      | SH-antigen (hepatitis b) test      |
| Serology                           | Serology                           |
| Serum Iron Studies                 | Iron studies                       |
| Serum Iron Studies                 | Serum iron tests                   |
| Serum Iron Studies                 | Total iron binding capacity        |
| Serum adrenaline                   | Serum adrenaline                   |
| Serum adrenocorticotrophic hormone | Serum adrenocorticotrophic hormone |
| Serum aldosterone                  | Serum aldosterone                  |
| Serum amino acids                  | Serum amino acids                  |
| Serum amiodarone                   | Serum amiodarone                   |
| Serum cortisol                     | Serum cortisol                     |
| Serum cyclosporin                  | Serum cyclosporin                  |
| Serum fibrinogen level             | Serum fibrinogen level             |
| Serum growth hormone               | Serum growth hormone               |
| Serum insulin                      | Serum insulin                      |
| Serum lactate                      | Serum lactate                      |
| Serum noradrenaline                | Serum noradrenaline                |
| Serum osmolality                   | Serum osmolality                   |
| Serum paracetamol                  | Serum paracetamol                  |
| Serum parathyroid hormone          | Serum parathyroid hormone          |
| Serum renin                        | Serum renin                        |
| Sex Hormones                       | Female sex hormone profile         |
| Sex Hormones                       | Follicle stimulating hormone       |

|                              |                              |
|------------------------------|------------------------------|
| Sex Hormones                 | Luteinising hormone          |
| Sex Hormones                 | Male sex hormone profile     |
| Sex Hormones                 | Oestrodiol level             |
| Sex Hormones                 | Progesterone                 |
| Sex Hormones                 | Sex hormone binding globulin |
| Sex Hormones                 | Testosterone                 |
| Sickle cell disease screen   | Sickle cell disease screen   |
| Syphilis test                | Syphilis test                |
| Theophylline                 | Theophylline                 |
| Thyroid Function Tests       | Free thyroxine               |
| Thyroid Function Tests       | Free tri-iodothyronine       |
| Thyroid Function Tests       | Thyroid function             |
| Thyroid Function Tests       | Thyroid stimulating hormone  |
| Thyroid Function Tests       | Thyroxine                    |
| Thyroid Function Tests       | Triiodothyronine             |
| Thyroid autoantibodies       | Thyroid autoantibodies       |
| Thyroid disorder screening   | Thyroid disorder screening   |
| Toxicology                   | Toxicology                   |
| Tricyclics                   | Tricyclics                   |
| Tuberculin test              | Tuberculin test              |
| Tumour markers               | Tumour markers               |
| Urine Leucocytes             | Urine Leucocytes             |
| Valproate                    | Valproate                    |
| Very low density lipoprotein | Very low density lipoprotein |
| Viral studies                | Viral studies                |

**Supplementary Table S6. Age-sex standardised testing rates (per 1,000 person years) by different characteristics for people with only hypertension, only type 2 diabetes, or only CKD**

|                  | Only hypertension (n=514,757) |                      |         |               |                          | Only T2 Diabetes (n=76,707) |                      |        |               |                          | Only CKD (n=37,585)  |                      |        |               |                          |
|------------------|-------------------------------|----------------------|---------|---------------|--------------------------|-----------------------------|----------------------|--------|---------------|--------------------------|----------------------|----------------------|--------|---------------|--------------------------|
|                  | Renal Function tests          | Liver Function tests | FBC     | Lipid Profile | HbA1c - diabetic control | Renal Function tests        | Liver Function tests | FBC    | Lipid Profile | HbA1c - diabetic control | Renal Function tests | Liver Function tests | FBC    | Lipid Profile | HbA1c - diabetic control |
| Number tested    | 452,375                       | 411,971              | 385,140 | 394,246       | 211,762                  | 73,296                      | 70,167               | 62,957 | 72,222        | 73,392                   | 33,761               | 31,282               | 31,284 | 25,753        | 14,776                   |
| % tested         | 88                            | 80                   | 75      | 77            | 41                       | 96                          | 92                   | 82     | 94            | 96                       | 90                   | 83                   | 83     | 69            | 39                       |
| <i>Sex</i>       |                               |                      |         |               |                          |                             |                      |        |               |                          |                      |                      |        |               |                          |
| <i>Men</i>       | 1,031                         | 797                  | 706     | 620           | 238                      | 1,645                       | 1,269                | 1,010  | 1,181         | 1,573                    | 1,496                | 1,025                | 1,111  | 602           | 241                      |
| <i>Women</i>     | 1,094                         | 858                  | 831     | 577           | 233                      | 1,707                       | 1,347                | 1,169  | 1,179         | 1,593                    | 1,422                | 1,063                | 1,165  | 521           | 228                      |
| <i>Age Group</i> |                               |                      |         |               |                          |                             |                      |        |               |                          |                      |                      |        |               |                          |
| 0-49             | 760                           | 579                  | 547     | 415           | 186                      | 1,400                       | 1,067                | 868    | 1,061         | 1,447                    | 1,077                | 738                  | 842    | 315           | 166                      |
| 50-59            | 890                           | 705                  | 618     | 541           | 217                      | 1,577                       | 1,278                | 1,009  | 1,193         | 1,581                    | 1,136                | 854                  | 895    | 451           | 216                      |
| 60-69            | 1,034                         | 828                  | 715     | 646           | 242                      | 1,756                       | 1,390                | 1,117  | 1,250         | 1,665                    | 1,341                | 1,034                | 1,033  | 590           | 236                      |
| 70-79            | 1,198                         | 942                  | 871     | 686           | 262                      | 1,939                       | 1,485                | 1,278  | 1,254         | 1,683                    | 1,501                | 1,114                | 1,160  | 644           | 261                      |
| 80-89            | 1,323                         | 987                  | 1,036   | 605           | 252                      | 2,074                       | 1,486                | 1,407  | 1,177         | 1,566                    | 1,672                | 1,167                | 1,343  | 576           | 243                      |
| 90+              | 1,230                         | 856                  | 1,014   | 419           | 188                      | 1,814                       | 1,295                | 1,334  | 874           | 1,240                    | 1,563                | 1,021                | 1,297  | 428           | 190                      |
| <i>Region</i>    |                               |                      |         |               |                          |                             |                      |        |               |                          |                      |                      |        |               |                          |



|                                   |       |       |     |     |     |       |       |       |       |       |       |       |       |     |     |
|-----------------------------------|-------|-------|-----|-----|-----|-------|-------|-------|-------|-------|-------|-------|-------|-----|-----|
| <i>North East</i>                 | 1,322 | 906   | 780 | 638 | 389 | 1,782 | 1,589 | 1,266 | 1,323 | 1,727 | 1,745 | 1,261 | 1,318 | 576 | 338 |
| <i>North West</i>                 | 1,084 | 864   | 846 | 665 | 500 | 1,610 | 1,394 | 1,408 | 1,235 | 1,632 | 1,377 | 1,025 | 1,081 | 669 | 509 |
| <i>Yorkshire &amp; the Humber</i> | 962   | 876   | 851 | 475 | 248 | 1,457 | 1,363 | 1,256 | 1,029 | 1,353 | 1,542 | 1,167 | 1,107 | 563 | 148 |
| <i>East Midlands</i>              | 1,017 | 634   | 531 | 450 | 487 | 1,575 | 1,073 | 431   | 895   | 1,631 | 1,083 | 803   | 630   | 486 | 455 |
| <i>West Midlands</i>              | 1,029 | 788   | 712 | 625 | 346 | 1,595 | 1,385 | 1,079 | 1,288 | 1,598 | 1,221 | 858   | 919   | 559 | 331 |
| <i>East of England</i>            | 947   | 686   | 638 | 533 | 177 | 1,527 | 1,220 | 872   | 1,140 | 1,534 | 1,199 | 842   | 876   | 490 | 198 |
| <i>South West</i>                 | 1,134 | 845   | 896 | 575 | 282 | 1,684 | 1,443 | 1,433 | 1,157 | 1,631 | 1,512 | 1,128 | 1,241 | 551 | 280 |
| <i>South Central</i>              | 963   | 652   | 663 | 507 | 146 | 1,538 | 1,248 | 1,018 | 1,127 | 1,586 | 1,341 | 851   | 960   | 477 | 120 |
| <i>London</i>                     | 943   | 735   | 718 | 587 | 279 | 1,459 | 1,186 | 1,056 | 1,108 | 1,450 | 1,049 | 784   | 848   | 516 | 258 |
| <i>South East Coast</i>           | 1,006 | 748   | 739 | 522 | 185 | 1,543 | 1,302 | 1,118 | 1,136 | 1,422 | 1,219 | 890   | 981   | 473 | 185 |
| <i>Northern Ireland</i>           | 1,247 | 1,093 | 892 | 672 | 200 | 1,960 | 1,716 | 1,282 | 1,411 | 1,644 | 1,738 | 1,332 | 1,249 | 702 | 250 |
| <i>Scotland</i>                   | 1,298 | 1,022 | 885 | 691 | 75  | 2,741 | 1,519 | 1,205 | 1,275 | 1,744 | 1,805 | 1,249 | 1,344 | 614 | 73  |
| <i>Wales</i>                      | 1,089 | 864   | 851 | 571 | 279 | 1,633 | 1,352 | 1,242 | 1,084 | 1,564 | 1,257 | 931   | 1,024 | 464 | 243 |
| <i>Year</i>                       |       |       |     |     |     |       |       |       |       |       |       |       |       |     |     |
| <i>2013/14</i>                    | 1,098 | 851   | 796 | 662 | 159 | 1,724 | 1,403 | 1,167 | 1,257 | 1,637 | 1,471 | 1,053 | 1,125 | 645 | 158 |
| <i>2014/15</i>                    | 1,071 | 829   | 795 | 575 | 201 | 1,755 | 1,363 | 1,164 | 1,173 | 1,570 | 1,402 | 1,011 | 1,096 | 539 | 196 |
| <i>2015/16</i>                    | 1,105 | 854   | 813 | 580 | 253 | 1,847 | 1,397 | 1,214 | 1,177 | 1,579 | 1,383 | 1,008 | 1,061 | 516 | 235 |
| <i>2016/17</i>                    | 1,122 | 862   | 827 | 577 | 299 | 1,864 | 1,374 | 1,231 | 1,141 | 1,558 | 1,374 | 979   | 1,068 | 507 | 282 |
| <i>2017/18</i>                    | 1,137 | 866   | 836 | 563 | 342 | 1,899 | 1,367 | 1,230 | 1,112 | 1,542 | 1,349 | 981   | 1,064 | 511 | 328 |
| <i>% change</i>                   | 3     | 2     | 5   | -15 | 115 | 10    | -3    | 5     | -11   | -6    | -8    | -7    | -5    | -21 | 107 |
| <i>Deprivation Quintile</i>       |       |       |     |     |     |       |       |       |       |       |       |       |       |     |     |
| <i>1 - Least</i>                  | 1,029 | 739   | 716 | 587 | 265 | 1,571 | 1,329 | 1,114 | 1,172 | 1,547 | 1,340 | 914   | 996   | 561 | 258 |

|                              |       |       |       |     |      |       |       |       |       |       |       |       |       |     |      |
|------------------------------|-------|-------|-------|-----|------|-------|-------|-------|-------|-------|-------|-------|-------|-----|------|
| 2                            | 1,024 | 761   | 749   | 574 | 252  | 1,540 | 1,290 | 1,106 | 1,158 | 1,535 | 1,296 | 925   | 1,024 | 546 | 255  |
| 3                            | 1,041 | 772   | 763   | 574 | 275  | 1,573 | 1,329 | 1,206 | 1,162 | 1,555 | 1,317 | 945   | 1,036 | 518 | 266  |
| 4                            | 1,022 | 775   | 783   | 565 | 283  | 1,541 | 1,284 | 1,167 | 1,130 | 1,516 | 1,263 | 928   | 1,017 | 518 | 270  |
| 5 - Most                     | 1,035 | 803   | 805   | 582 | 331  | 1,560 | 1,303 | 1,213 | 1,148 | 1,536 | 1,315 | 961   | 1,029 | 563 | 307  |
| Missing                      | 1,134 | 903   | 828   | 611 | 203  | 1,991 | 1,435 | 1,204 | 1,208 | 1,627 | 1,451 | 1,061 | 1,116 | 549 | 199  |
| <i>Ethnicity</i>             |       |       |       |     |      |       |       |       |       |       |       |       |       |     |      |
| White                        | 1,094 | 821   | 819   | 590 | 284  | 1,620 | 1,363 | 1,223 | 1,166 | 1,561 | 1,383 | 984   | 1,082 | 548 | 275  |
| Black                        | 960   | 749   | 799   | 607 | 367  | 1,447 | 1,115 | 1,018 | 1,136 | 1,459 | 970   | 735   | 813   | 504 | 291  |
| Asian                        | 1,155 | 943   | 984   | 724 | 444  | 1,615 | 1,355 | 1,246 | 1,233 | 1,594 | 1,409 | 1,102 | 1,212 | 660 | 416  |
| Other                        | 1,018 | 805   | 805   | 631 | 338  | 1,502 | 1,243 | 1,093 | 1,169 | 1,521 | 1,110 | 886   | 873   | 594 | 285  |
| Missing                      | 1,087 | 854   | 782   | 596 | 206  | 1,905 | 1,389 | 1,161 | 1,190 | 1,598 | 1,391 | 1,014 | 1,067 | 543 | 199  |
| <i>Time since diagnosis</i>  |       |       |       |     |      |       |       |       |       |       |       |       |       |     |      |
| < 1 year                     | 1,392 | 949   | 863   | 708 | 241  | 1,898 | 1,538 | 1,207 | 1,349 | 1,878 | 1,712 | 1,116 | 1,189 | 566 | 221  |
| >= 1 year                    | 1,074 | 839   | 795   | 592 | 237  | 1,800 | 1,375 | 1,193 | 1,181 | 1,577 | 1,354 | 994   | 1,065 | 547 | 234  |
| <i>GP practice variation</i> |       |       |       |     |      |       |       |       |       |       |       |       |       |     |      |
| 10th percentile              | 780   | 534   | 529   | 381 | 33   | 1,191 | 872   | 571   | 887   | 1,193 | 815   | 518   | 568   | 279 | 18   |
| 90th percentile              | 1,387 | 1,159 | 1,148 | 849 | 548  | 2,423 | 1,775 | 1,647 | 1,453 | 1,885 | 1,857 | 1,337 | 1,450 | 760 | 494  |
| 90/10 ratio                  | 1.8   | 2.2   | 2.2   | 2.2 | 16.6 | 2.0   | 2.0   | 2.9   | 1.6   | 1.6   | 2.3   | 2.6   | 2.6   | 2.7 | 27.1 |

**Supplementary Table S7. Age-sex standardised testing rates (per 1,000 person years) by different characteristics for people with only hypertension**

|                   | Renal Function tests | Liver Function tests | FBC     | Lipid Profile | HbA1c - diabetic control | Thyroid Function tests | Glucose | ACR / Microalbumin | Bone Profile | Haematinics | C Reactive protein | Erythrocyte sedimentation rate |
|-------------------|----------------------|----------------------|---------|---------------|--------------------------|------------------------|---------|--------------------|--------------|-------------|--------------------|--------------------------------|
| Number tested     | 452,375              | 411,971              | 385,140 | 394,246       | 211,762                  | 311,008                | 333,341 | 65,127             | 203,641      | 164,874     | 174,453            | 133,813                        |
| % tested          | 87.9                 | 80.0                 | 74.8    | 76.6          | 41.1                     | 60.4                   | 64.8    | 12.7               | 39.6         | 32.0        | 33.9               | 26.0                           |
| <i>Sex</i>        |                      |                      |         |               |                          |                        |         |                    |              |             |                    |                                |
| <i>Men</i>        | 1,031                | 797                  | 706     | 620           | 238                      | 351                    | 476     | 62                 | 206          | 149         | 181                | 131                            |
| <i>Women</i>      | 1,094                | 858                  | 831     | 577           | 233                      | 529                    | 471     | 61                 | 269          | 220         | 254                | 201                            |
| <i>Age Group</i>  |                      |                      |         |               |                          |                        |         |                    |              |             |                    |                                |
| <i>0-49</i>       | 760                  | 579                  | 547     | 415           | 186                      | 350                    | 338     | 46                 | 156          | 148         | 155                | 117                            |
| <i>50-59</i>      | 890                  | 705                  | 618     | 541           | 217                      | 381                    | 416     | 46                 | 182          | 143         | 180                | 138                            |
| <i>60-69</i>      | 1,034                | 828                  | 715     | 646           | 242                      | 425                    | 490     | 60                 | 214          | 150         | 204                | 156                            |
| <i>70-79</i>      | 1,198                | 942                  | 871     | 686           | 262                      | 483                    | 531     | 73                 | 271          | 198         | 247                | 192                            |
| <i>80-89</i>      | 1,323                | 987                  | 1,036   | 605           | 252                      | 548                    | 532     | 77                 | 348          | 293         | 290                | 222                            |
| <i>90+</i>        | 1,230                | 856                  | 1,014   | 419           | 188                      | 523                    | 439     | 61                 | 352          | 333         | 264                | 181                            |
| <i>Region</i>     |                      |                      |         |               |                          |                        |         |                    |              |             |                    |                                |
| <i>North East</i> | 1,322                | 906                  | 780     | 638           | 389                      | 438                    | 581     | 123                | 276          | 150         | 217                | 198                            |

|                                   |       |       |     |     |     |     |     |    |     |     |     |     |
|-----------------------------------|-------|-------|-----|-----|-----|-----|-----|----|-----|-----|-----|-----|
| <i>North West</i>                 | 1,084 | 864   | 846 | 665 | 500 | 538 | 305 | 87 | 343 | 237 | 203 | 188 |
| <i>Yorkshire &amp; the Humber</i> | 962   | 876   | 851 | 475 | 248 | 445 | 317 | 61 | 640 | 280 | 145 | 118 |
| <i>East Midlands</i>              | 1,017 | 634   | 531 | 450 | 487 | 258 | 67  | 36 | 209 | 123 | 104 | 128 |
| <i>West Midlands</i>              | 1,029 | 788   | 712 | 625 | 346 | 421 | 372 | 38 | 254 | 211 | 182 | 162 |
| <i>East of England</i>            | 947   | 686   | 638 | 533 | 177 | 360 | 389 | 27 | 146 | 167 | 178 | 210 |
| <i>South West</i>                 | 1,134 | 845   | 896 | 575 | 282 | 465 | 468 | 90 | 276 | 193 | 283 | 60  |
| <i>South Central</i>              | 963   | 652   | 663 | 507 | 146 | 350 | 441 | 74 | 218 | 149 | 272 | 145 |
| <i>London</i>                     | 943   | 735   | 718 | 587 | 279 | 451 | 454 | 27 | 214 | 236 | 149 | 208 |
| <i>South East Coast</i>           | 1,006 | 748   | 739 | 522 | 185 | 403 | 416 | 57 | 230 | 162 | 222 | 240 |
| <i>Northern Ireland</i>           | 1,247 | 1,093 | 892 | 672 | 200 | 531 | 506 | 82 | 312 | 278 | 364 | 340 |
| <i>Scotland</i>                   | 1,298 | 1,022 | 885 | 691 | 75  | 511 | 790 | 70 | 228 | 170 | 222 | 130 |
| <i>Wales</i>                      | 1,089 | 864   | 851 | 571 | 279 | 445 | 409 | 65 | 251 | 207 | 229 | 137 |

*Year*

|                 |       |     |     |     |     |     |     |     |     |     |     |     |
|-----------------|-------|-----|-----|-----|-----|-----|-----|-----|-----|-----|-----|-----|
| <i>2013/14</i>  | 1,098 | 851 | 796 | 662 | 159 | 466 | 582 | 76  | 243 | 173 | 209 | 181 |
| <i>2014/15</i>  | 1,071 | 829 | 795 | 575 | 201 | 443 | 497 | 62  | 253 | 191 | 223 | 176 |
| <i>2015/16</i>  | 1,105 | 854 | 813 | 580 | 253 | 451 | 468 | 57  | 266 | 206 | 235 | 175 |
| <i>2016/17</i>  | 1,122 | 862 | 827 | 577 | 299 | 457 | 412 | 59  | 258 | 226 | 236 | 169 |
| <i>2017/18</i>  | 1,137 | 866 | 836 | 563 | 342 | 454 | 369 | 58  | 255 | 237 | 247 | 152 |
| <i>% change</i> | 3     | 2   | 5   | -15 | 115 | -3  | -37 | -24 | 5   | 37  | 19  | -16 |

*Deprivation Quintile*

|                  |       |     |     |     |     |     |     |    |     |     |     |     |
|------------------|-------|-----|-----|-----|-----|-----|-----|----|-----|-----|-----|-----|
| <i>1 - Least</i> | 1,029 | 739 | 716 | 587 | 265 | 422 | 402 | 50 | 212 | 178 | 206 | 177 |
| <i>2</i>         | 1,024 | 761 | 749 | 574 | 252 | 422 | 431 | 52 | 236 | 184 | 207 | 184 |

|          |       |     |     |     |     |     |     |    |     |     |     |     |
|----------|-------|-----|-----|-----|-----|-----|-----|----|-----|-----|-----|-----|
| 3        | 1,041 | 772 | 763 | 574 | 275 | 420 | 415 | 58 | 259 | 195 | 225 | 168 |
| 4        | 1,022 | 775 | 783 | 565 | 283 | 441 | 408 | 58 | 263 | 207 | 211 | 170 |
| 5 - Most | 1,035 | 803 | 805 | 582 | 331 | 480 | 396 | 71 | 297 | 218 | 194 | 159 |
| Missing  | 1,134 | 903 | 828 | 611 | 203 | 464 | 531 | 68 | 250 | 199 | 236 | 168 |

*Ethnicity*

|         |       |     |     |     |     |     |     |    |     |     |     |     |
|---------|-------|-----|-----|-----|-----|-----|-----|----|-----|-----|-----|-----|
| White   | 1,094 | 821 | 819 | 590 | 284 | 457 | 426 | 59 | 269 | 208 | 238 | 190 |
| Black   | 960   | 749 | 799 | 607 | 367 | 446 | 422 | 45 | 267 | 240 | 170 | 201 |
| Asian   | 1,155 | 943 | 984 | 724 | 444 | 599 | 514 | 51 | 374 | 395 | 233 | 283 |
| Other   | 1,018 | 805 | 805 | 631 | 338 | 481 | 457 | 46 | 274 | 232 | 202 | 204 |
| Missing | 1,087 | 854 | 782 | 596 | 206 | 444 | 506 | 65 | 236 | 187 | 219 | 158 |

*Time since diagnosis*

|           |       |     |     |     |     |     |     |    |     |     |     |     |
|-----------|-------|-----|-----|-----|-----|-----|-----|----|-----|-----|-----|-----|
| < 1 year  | 1,392 | 949 | 863 | 708 | 241 | 504 | 538 | 95 | 271 | 207 | 231 | 191 |
| >= 1 year | 1,074 | 839 | 795 | 592 | 237 | 449 | 476 | 61 | 248 | 196 | 225 | 170 |

*Region variation*

|                 |       |       |     |     |     |     |     |     |     |     |     |     |
|-----------------|-------|-------|-----|-----|-----|-----|-----|-----|-----|-----|-----|-----|
| 10th percentile | 947   | 652   | 638 | 475 | 146 | 350 | 305 | 27  | 209 | 149 | 145 | 118 |
| 90th percentile | 1,298 | 1,022 | 892 | 672 | 487 | 531 | 581 | 90  | 343 | 278 | 283 | 240 |
| 90/10 ratio     | 1.4   | 1.6   | 1.4 | 1.4 | 3.3 | 1.5 | 1.9 | 3.3 | 1.6 | 1.9 | 1.9 | 2.0 |

*GP practice variation*

|                 |       |       |       |     |      |     |     |      |     |     |     |       |
|-----------------|-------|-------|-------|-----|------|-----|-----|------|-----|-----|-----|-------|
| 10th percentile | 780   | 534   | 529   | 381 | 33   | 264 | 157 | 11   | 101 | 102 | 95  | 1     |
| 90th percentile | 1,387 | 1,159 | 1,148 | 849 | 548  | 745 | 901 | 147  | 467 | 308 | 368 | 312   |
| 90/10 ratio     | 1.8   | 2.2   | 2.2   | 2.2 | 16.6 | 2.8 | 5.7 | 13.2 | 4.6 | 3.0 | 3.9 | 388.7 |

**Supplementary Table S8. Age-sex standardised testing rates (per 1,000 person years) by different characteristics for people with only type 2 diabetes**

| Test              | Renal Function tests | Liver Function tests | FBC    | Lipid Profile | HbA1c - diabetic control | Thyroid Function tests | Glucose | ACR / Microalbumin | Bone Profile | Haematinics | C Reactive protein | Erythrocyte sedimentation rate |
|-------------------|----------------------|----------------------|--------|---------------|--------------------------|------------------------|---------|--------------------|--------------|-------------|--------------------|--------------------------------|
| Number tested     | 73,296               | 70,167               | 62,957 | 72,222        | 73,392                   | 59,249                 | 41,553  | 63,013             | 29,744       | 31,955      | 24,119             | 17,872                         |
| % tested          | 95.6                 | 91.5                 | 82.1   | 94.2          | 95.7                     | 77.2                   | 54.2    | 82.1               | 38.8         | 41.7        | 31.4               | 23.3                           |
| <i>Sex</i>        |                      |                      |        |               |                          |                        |         |                    |              |             |                    |                                |
| <i>Men</i>        | 1,645                | 1,269                | 1,010  | 1,181         | 1,573                    | 737                    | 491     | 782                | 253          | 281         | 174                | 121                            |
| <i>Women</i>      | 1,707                | 1,347                | 1,169  | 1,179         | 1,593                    | 895                    | 496     | 724                | 310          | 375         | 262                | 191                            |
| <i>Age Group</i>  |                      |                      |        |               |                          |                        |         |                    |              |             |                    |                                |
| <i>0-49</i>       | 1,400                | 1,067                | 868    | 1,061         | 1,447                    | 710                    | 428     | 571                | 215          | 256         | 166                | 112                            |
| <i>50-59</i>      | 1,577                | 1,278                | 1,009  | 1,193         | 1,581                    | 789                    | 476     | 728                | 261          | 288         | 198                | 141                            |
| <i>60-69</i>      | 1,756                | 1,390                | 1,117  | 1,250         | 1,665                    | 830                    | 518     | 853                | 279          | 321         | 211                | 152                            |
| <i>70-79</i>      | 1,939                | 1,485                | 1,278  | 1,254         | 1,683                    | 874                    | 543     | 925                | 330          | 387         | 253                | 186                            |
| <i>80-89</i>      | 2,074                | 1,486                | 1,407  | 1,177         | 1,566                    | 896                    | 582     | 866                | 407          | 476         | 283                | 213                            |
| <i>90+</i>        | 1,814                | 1,295                | 1,334  | 874           | 1,240                    | 778                    | 564     | 573                | 401          | 468         | 289                | 180                            |
| <i>Region</i>     |                      |                      |        |               |                          |                        |         |                    |              |             |                    |                                |
| <i>North East</i> | 1,782                | 1,589                | 1,266  | 1,323         | 1,727                    | 941                    | 380     | 688                | 460          | 159         | 250                | 162                            |

|                                   |       |       |       |       |       |       |       |     |     |     |     |     |
|-----------------------------------|-------|-------|-------|-------|-------|-------|-------|-----|-----|-----|-----|-----|
| <i>North West</i>                 | 1,610 | 1,394 | 1,408 | 1,235 | 1,632 | 1,003 | 349   | 857 | 500 | 577 | 220 | 196 |
| <i>Yorkshire &amp; the Humber</i> | 1,457 | 1,363 | 1,256 | 1,029 | 1,353 | 745   | 321   | 845 | 722 | 593 | 132 | 183 |
| <i>East Midlands</i>              | 1,575 | 1,073 | 431   | 895   | 1,631 | 873   | 62    | 753 | 129 | 176 | 48  | 39  |
| <i>West Midlands</i>              | 1,595 | 1,385 | 1,079 | 1,288 | 1,598 | 892   | 495   | 773 | 311 | 389 | 177 | 167 |
| <i>East of England</i>            | 1,527 | 1,220 | 872   | 1,140 | 1,534 | 543   | 482   | 765 | 160 | 252 | 185 | 211 |
| <i>South West</i>                 | 1,684 | 1,443 | 1,433 | 1,157 | 1,631 | 809   | 495   | 780 | 296 | 358 | 337 | 53  |
| <i>South Central</i>              | 1,538 | 1,248 | 1,018 | 1,127 | 1,586 | 765   | 368   | 882 | 348 | 275 | 269 | 133 |
| <i>London</i>                     | 1,459 | 1,186 | 1,056 | 1,108 | 1,450 | 723   | 477   | 704 | 256 | 435 | 159 | 222 |
| <i>South East Coast</i>           | 1,543 | 1,302 | 1,118 | 1,136 | 1,422 | 768   | 448   | 695 | 280 | 263 | 218 | 231 |
| <i>Northern Ireland</i>           | 1,960 | 1,716 | 1,282 | 1,411 | 1,644 | 1,015 | 1,050 | 850 | 474 | 454 | 435 | 336 |
| <i>Scotland</i>                   | 2,741 | 1,519 | 1,205 | 1,275 | 1,744 | 1,010 | 582   | 867 | 241 | 268 | 242 | 135 |
| <i>Wales</i>                      | 1,633 | 1,352 | 1,242 | 1,084 | 1,564 | 771   | 580   | 784 | 303 | 411 | 242 | 139 |

*Year*

|                 |       |       |       |       |       |     |     |     |     |     |     |     |
|-----------------|-------|-------|-------|-------|-------|-----|-----|-----|-----|-----|-----|-----|
| <i>2013/14</i>  | 1,724 | 1,403 | 1,167 | 1,257 | 1,637 | 866 | 640 | 973 | 319 | 312 | 220 | 139 |
| <i>2014/15</i>  | 1,755 | 1,363 | 1,164 | 1,173 | 1,570 | 825 | 538 | 797 | 322 | 337 | 236 | 167 |
| <i>2015/16</i>  | 1,847 | 1,397 | 1,214 | 1,177 | 1,579 | 851 | 510 | 745 | 339 | 385 | 247 | 183 |
| <i>2016/17</i>  | 1,864 | 1,374 | 1,231 | 1,141 | 1,558 | 853 | 453 | 705 | 310 | 428 | 256 | 184 |
| <i>2017/18</i>  | 1,899 | 1,367 | 1,230 | 1,112 | 1,542 | 840 | 397 | 688 | 310 | 451 | 263 | 175 |
| <i>% change</i> | 10    | -3    | 5     | -11   | -6    | -3  | -38 | -29 | -3  | 45  | 20  | 26  |

*Deprivation Quintile*

|                  |       |       |       |       |       |     |     |     |     |     |     |     |
|------------------|-------|-------|-------|-------|-------|-----|-----|-----|-----|-----|-----|-----|
| <i>1 - Least</i> | 1,571 | 1,329 | 1,114 | 1,172 | 1,547 | 818 | 391 | 800 | 237 | 379 | 225 | 184 |
| <i>2</i>         | 1,540 | 1,290 | 1,106 | 1,158 | 1,535 | 789 | 426 | 772 | 288 | 345 | 210 | 179 |

|          |       |       |       |       |       |     |     |     |     |     |     |     |
|----------|-------|-------|-------|-------|-------|-----|-----|-----|-----|-----|-----|-----|
| 3        | 1,573 | 1,329 | 1,206 | 1,162 | 1,555 | 802 | 424 | 789 | 347 | 346 | 237 | 179 |
| 4        | 1,541 | 1,284 | 1,167 | 1,130 | 1,516 | 791 | 415 | 746 | 346 | 390 | 228 | 177 |
| 5 - Most | 1,560 | 1,303 | 1,213 | 1,148 | 1,536 | 852 | 421 | 731 | 393 | 416 | 204 | 159 |
| Missing  | 1,991 | 1,435 | 1,204 | 1,208 | 1,627 | 875 | 609 | 824 | 313 | 361 | 253 | 170 |

*Ethnicity*

|         |       |       |       |       |       |     |     |     |     |     |     |     |
|---------|-------|-------|-------|-------|-------|-----|-----|-----|-----|-----|-----|-----|
| White   | 1,620 | 1,363 | 1,223 | 1,166 | 1,561 | 841 | 427 | 773 | 338 | 385 | 250 | 187 |
| Black   | 1,447 | 1,115 | 1,018 | 1,136 | 1,459 | 678 | 379 | 744 | 248 | 312 | 144 | 177 |
| Asian   | 1,615 | 1,355 | 1,246 | 1,233 | 1,594 | 859 | 446 | 809 | 397 | 547 | 216 | 231 |
| Other   | 1,502 | 1,243 | 1,093 | 1,169 | 1,521 | 783 | 464 | 762 | 336 | 340 | 167 | 176 |
| Missing | 1,905 | 1,389 | 1,161 | 1,190 | 1,598 | 848 | 576 | 813 | 299 | 348 | 235 | 162 |

*Time since diagnosis*

|           |       |       |       |       |       |     |     |     |     |     |     |     |
|-----------|-------|-------|-------|-------|-------|-----|-----|-----|-----|-----|-----|-----|
| < 1 year  | 1,898 | 1,538 | 1,207 | 1,349 | 1,878 | 881 | 759 | 956 | 345 | 343 | 258 | 198 |
| >= 1 year | 1,800 | 1,375 | 1,193 | 1,181 | 1,577 | 850 | 504 | 792 | 316 | 372 | 240 | 173 |

*Region variation*

|                 |       |       |       |       |       |       |     |     |     |     |     |     |
|-----------------|-------|-------|-------|-------|-------|-------|-----|-----|-----|-----|-----|-----|
| 10th percentile | 1,459 | 1,186 | 872   | 1,029 | 1,422 | 723   | 321 | 695 | 160 | 176 | 132 | 53  |
| 90th percentile | 1,960 | 1,589 | 1,408 | 1,323 | 1,727 | 1,010 | 582 | 867 | 500 | 577 | 337 | 231 |
| 90/10 ratio     | 1.3   | 1.3   | 1.6   | 1.3   | 1.2   | 1.4   | 1.8 | 1.2 | 3.1 | 3.3 | 2.5 | 4.4 |

*GP practice variation*

|                 |       |       |       |       |       |       |       |       |     |     |     |     |
|-----------------|-------|-------|-------|-------|-------|-------|-------|-------|-----|-----|-----|-----|
| 10th percentile | 1,191 | 872   | 571   | 887   | 1,193 | 323   | 95    | 509   | 90  | 112 | 88  | 0   |
| 90th percentile | 2,423 | 1,775 | 1,647 | 1,453 | 1,885 | 1,200 | 1,235 | 1,025 | 686 | 659 | 395 | 336 |
| 90/10 ratio     | 2.0   | 2.0   | 2.9   | 1.6   | 1.6   | 3.7   | 13.0  | 2.0   | 7.6 | 5.9 | 4.5 | n/a |



**Supplementary Table S9. Age-sex standardised testing rates (per 1,000 person years) by different characteristics for people with only CKD**

| Test              | Renal Function tests | Liver Function tests | FBC    | Lipid Profile | HbA1c - diabetic control | Thyroid Function tests | Glucose | ACR / Microalbumin | Bone Profile | Haematinics | C Reactive protein | Erythrocyte sedimentation rate |
|-------------------|----------------------|----------------------|--------|---------------|--------------------------|------------------------|---------|--------------------|--------------|-------------|--------------------|--------------------------------|
| Number tested     | 33,761               | 31,282               | 31,284 | 25,753        | 14,776                   | 25,423                 | 23,083  | 23,701             | 19,908       | 17,234      | 16,845             | 12,400                         |
| % tested          | 89.8                 | 83.2                 | 83.2   | 68.5          | 39.3                     | 67.6                   | 61.4    | 63.1               | 53.0         | 45.9        | 44.8               | 33.0                           |
| <i>Sex</i>        |                      |                      |        |               |                          |                        |         |                    |              |             |                    |                                |
| <i>Men</i>        | 1,496                | 1,025                | 1,111  | 602           | 241                      | 495                    | 489     | 430                | 376          | 292         | 316                | 209                            |
| <i>Women</i>      | 1,422                | 1,063                | 1,165  | 521           | 228                      | 682                    | 463     | 395                | 418          | 338         | 392                | 297                            |
| <i>Age Group</i>  |                      |                      |        |               |                          |                        |         |                    |              |             |                    |                                |
| <i>0-49</i>       | 1,077                | 738                  | 842    | 315           | 166                      | 426                    | 307     | 232                | 301          | 241         | 292                | 191                            |
| <i>50-59</i>      | 1,136                | 854                  | 895    | 451           | 216                      | 562                    | 380     | 295                | 319          | 245         | 329                | 230                            |
| <i>60-69</i>      | 1,341                | 1,034                | 1,033  | 590           | 236                      | 612                    | 463     | 379                | 368          | 248         | 363                | 267                            |
| <i>70-79</i>      | 1,501                | 1,114                | 1,160  | 644           | 261                      | 630                    | 505     | 446                | 398          | 303         | 375                | 287                            |
| <i>80-89</i>      | 1,672                | 1,167                | 1,343  | 576           | 243                      | 653                    | 532     | 482                | 478          | 404         | 393                | 289                            |
| <i>90+</i>        | 1,563                | 1,021                | 1,297  | 428           | 190                      | 616                    | 466     | 418                | 447          | 433         | 340                | 212                            |
| <i>Region</i>     |                      |                      |        |               |                          |                        |         |                    |              |             |                    |                                |
| <i>North East</i> | 1,745                | 1,261                | 1,318  | 576           | 338                      | 602                    | 437     | 504                | 659          | 177         | 230                | 320                            |

|                                   |       |       |       |     |     |     |     |     |     |     |     |     |
|-----------------------------------|-------|-------|-------|-----|-----|-----|-----|-----|-----|-----|-----|-----|
| <i>North West</i>                 | 1,377 | 1,025 | 1,081 | 669 | 509 | 654 | 317 | 478 | 536 | 377 | 294 | 257 |
| <i>Yorkshire &amp; the Humber</i> | 1,542 | 1,167 | 1,107 | 563 | 148 | 415 | 434 | 506 | 776 | 370 | 222 | 193 |
| <i>East Midlands</i>              | 1,083 | 803   | 630   | 486 | 455 | 321 | 105 | 569 | 423 | 32  | 182 | 121 |
| <i>West Midlands</i>              | 1,221 | 858   | 919   | 559 | 331 | 550 | 360 | 395 | 333 | 316 | 242 | 211 |
| <i>East of England</i>            | 1,199 | 842   | 876   | 490 | 198 | 502 | 373 | 455 | 230 | 248 | 280 | 303 |
| <i>South West</i>                 | 1,512 | 1,128 | 1,241 | 551 | 280 | 650 | 455 | 485 | 485 | 308 | 413 | 94  |
| <i>South Central</i>              | 1,341 | 851   | 960   | 477 | 120 | 447 | 454 | 459 | 336 | 226 | 428 | 219 |
| <i>London</i>                     | 1,049 | 784   | 848   | 516 | 258 | 521 | 404 | 317 | 269 | 289 | 214 | 299 |
| <i>South East Coast</i>           | 1,219 | 890   | 981   | 473 | 185 | 489 | 380 | 346 | 311 | 220 | 348 | 356 |
| <i>Northern Ireland</i>           | 1,738 | 1,332 | 1,249 | 702 | 250 | 745 | 572 | 320 | 410 | 393 | 558 | 477 |
| <i>Scotland</i>                   | 1,805 | 1,249 | 1,344 | 614 | 73  | 640 | 726 | 524 | 438 | 275 | 358 | 185 |
| <i>Wales</i>                      | 1,257 | 931   | 1,024 | 464 | 243 | 532 | 376 | 219 | 336 | 302 | 323 | 161 |

*Year*

|                 |       |       |       |     |     |     |     |     |     |     |     |     |
|-----------------|-------|-------|-------|-----|-----|-----|-----|-----|-----|-----|-----|-----|
| <i>2013/14</i>  | 1,471 | 1,053 | 1,125 | 645 | 158 | 611 | 576 | 637 | 388 | 260 | 328 | 266 |
| <i>2014/15</i>  | 1,402 | 1,011 | 1,096 | 539 | 196 | 566 | 487 | 528 | 387 | 278 | 341 | 253 |
| <i>2015/16</i>  | 1,383 | 1,008 | 1,061 | 516 | 235 | 557 | 446 | 266 | 392 | 297 | 348 | 249 |
| <i>2016/17</i>  | 1,374 | 979   | 1,068 | 507 | 282 | 564 | 383 | 216 | 364 | 323 | 354 | 235 |
| <i>2017/18</i>  | 1,349 | 981   | 1,064 | 511 | 328 | 574 | 349 | 197 | 372 | 339 | 368 | 221 |
| <i>% change</i> | -8    | -7    | -5    | -21 | 107 | -6  | -40 | -69 | -4  | 30  | 12  | -17 |

*Deprivation Quintile*

|                  |       |     |       |     |     |     |     |     |     |     |     |     |
|------------------|-------|-----|-------|-----|-----|-----|-----|-----|-----|-----|-----|-----|
| <i>1 - Least</i> | 1,340 | 914 | 996   | 561 | 258 | 522 | 401 | 442 | 314 | 263 | 328 | 251 |
| <i>2</i>         | 1,296 | 925 | 1,024 | 546 | 255 | 553 | 409 | 426 | 344 | 266 | 317 | 252 |

|          |       |       |       |     |     |     |     |     |     |     |     |     |
|----------|-------|-------|-------|-----|-----|-----|-----|-----|-----|-----|-----|-----|
| 3        | 1,317 | 945   | 1,036 | 518 | 266 | 516 | 381 | 403 | 378 | 270 | 354 | 258 |
| 4        | 1,263 | 928   | 1,017 | 518 | 270 | 548 | 408 | 388 | 375 | 288 | 319 | 248 |
| 5 - Most | 1,315 | 961   | 1,029 | 563 | 307 | 588 | 429 | 403 | 432 | 292 | 291 | 209 |
| Missing  | 1,451 | 1,061 | 1,116 | 549 | 199 | 595 | 497 | 363 | 389 | 303 | 362 | 246 |

*Ethnicity*

|         |       |       |       |     |     |     |     |     |     |     |     |     |
|---------|-------|-------|-------|-----|-----|-----|-----|-----|-----|-----|-----|-----|
| White   | 1,383 | 984   | 1,082 | 548 | 275 | 561 | 415 | 420 | 384 | 291 | 352 | 265 |
| Black   | 970   | 735   | 813   | 504 | 291 | 423 | 361 | 255 | 406 | 265 | 225 | 144 |
| Asian   | 1,409 | 1,102 | 1,212 | 660 | 416 | 596 | 476 | 450 | 472 | 395 | 326 | 309 |
| Other   | 1,110 | 886   | 873   | 594 | 285 | 562 | 456 | 364 | 326 | 251 | 238 | 232 |
| Missing | 1,391 | 1,014 | 1,067 | 543 | 199 | 577 | 480 | 365 | 372 | 288 | 342 | 234 |

*Time since diagnosis*

|           |       |       |       |     |     |     |     |     |     |     |     |     |
|-----------|-------|-------|-------|-----|-----|-----|-----|-----|-----|-----|-----|-----|
| < 1 year  | 1,712 | 1,116 | 1,189 | 566 | 221 | 597 | 491 | 565 | 425 | 343 | 381 | 280 |
| >= 1 year | 1,354 | 994   | 1,065 | 547 | 234 | 571 | 453 | 369 | 374 | 285 | 342 | 244 |

*Region variation*

|                 |       |       |       |     |     |     |     |     |     |     |     |     |
|-----------------|-------|-------|-------|-----|-----|-----|-----|-----|-----|-----|-----|-----|
| 10th percentile | 1,083 | 803   | 848   | 473 | 120 | 415 | 317 | 317 | 269 | 177 | 214 | 121 |
| 90th percentile | 1,745 | 1,261 | 1,318 | 669 | 455 | 654 | 572 | 524 | 659 | 377 | 428 | 356 |
| 90/10 ratio     | 1.6   | 1.6   | 1.6   | 1.4 | 3.8 | 1.6 | 1.8 | 1.7 | 2.5 | 2.1 | 2.0 | 3.0 |

*GP practice variation*

|                 |       |       |       |     |      |     |     |     |     |     |     |     |
|-----------------|-------|-------|-------|-----|------|-----|-----|-----|-----|-----|-----|-----|
| 10th percentile | 815   | 518   | 568   | 279 | 18   | 301 | 117 | 129 | 124 | 106 | 88  | 0   |
| 90th percentile | 1,857 | 1,337 | 1,450 | 760 | 494  | 767 | 757 | 671 | 657 | 454 | 557 | 476 |
| 90/10 ratio     | 2.3   | 2.6   | 2.6   | 2.7 | 27.1 | 2.5 | 6.5 | 5.2 | 5.3 | 4.3 | 6.4 | n/a |

**Supplementary Table S10. Age-sex standardised testing rates (per 1,000 person years) by different characteristics of the whole cohort**

| Test              | Renal Function tests | Liver Function tests | FBC     | Lipid Profile | HbA1c - diabetic control | Thyroid Function tests | Glucose | ACR / Microalbumin | Bone Profile | Haematinics | C Reactive protein | Erythrocyte sedimentation rate |
|-------------------|----------------------|----------------------|---------|---------------|--------------------------|------------------------|---------|--------------------|--------------|-------------|--------------------|--------------------------------|
| Number tested     | 856,969              | 798,082              | 750,206 | 770,734       | 538,603                  | 633,928                | 601,569 | 401,897            | 413,989      | 370,012     | 345,345            | 259,641                        |
| % tested          | 91.8                 | 85.5                 | 80.3    | 82.5          | 57.7                     | 67.9                   | 64.4    | 43.0               | 44.3         | 39.6        | 37.0               | 27.8                           |
| <i>Sex</i>        |                      |                      |         |               |                          |                        |         |                    |              |             |                    |                                |
| <i>Men</i>        | 1,435                | 1,034                | 924     | 828           | 694                      | 509                    | 515     | 368                | 265          | 233         | 207                | 145                            |
| <i>Women</i>      | 1,460                | 1,071                | 1,042   | 744           | 575                      | 661                    | 514     | 319                | 331          | 298         | 289                | 222                            |
| <i>Age Group</i>  |                      |                      |         |               |                          |                        |         |                    |              |             |                    |                                |
| <i>0-49</i>       | 1,035                | 770                  | 687     | 639           | 610                      | 474                    | 382     | 235                | 191          | 193         | 168                | 120                            |
| <i>50-59</i>      | 1,168                | 906                  | 771     | 743           | 631                      | 516                    | 455     | 267                | 221          | 198         | 197                | 147                            |
| <i>60-69</i>      | 1,355                | 1,034                | 887     | 833           | 661                      | 563                    | 519     | 324                | 256          | 216         | 223                | 167                            |
| <i>70-79</i>      | 1,596                | 1,160                | 1,080   | 864           | 673                      | 625                    | 560     | 391                | 327          | 281         | 276                | 210                            |
| <i>80-89</i>      | 1,796                | 1,213                | 1,274   | 781           | 610                      | 680                    | 574     | 429                | 418          | 381         | 323                | 239                            |
| <i>90+</i>        | 1,658                | 1,059                | 1,248   | 565           | 415                      | 630                    | 500     | 352                | 419          | 405         | 306                | 195                            |
| <i>Region</i>     |                      |                      |         |               |                          |                        |         |                    |              |             |                    |                                |
| <i>North East</i> | 1,597                | 1,184                | 1,026   | 857           | 767                      | 608                    | 563     | 385                | 402          | 176         | 239                | 215                            |

|                                   |       |       |       |     |     |     |     |     |     |     |     |     |
|-----------------------------------|-------|-------|-------|-----|-----|-----|-----|-----|-----|-----|-----|-----|
| <i>North West</i>                 | 1,404 | 1,088 | 1,098 | 857 | 870 | 705 | 333 | 398 | 441 | 371 | 228 | 202 |
| <i>Yorkshire &amp; the Humber</i> | 1,239 | 1,101 | 1,034 | 657 | 583 | 550 | 318 | 384 | 780 | 379 | 155 | 129 |
| <i>East Midlands</i>              | 1,353 | 844   | 563   | 600 | 876 | 481 | 86  | 363 | 237 | 154 | 111 | 133 |
| <i>West Midlands</i>              | 1,350 | 1,023 | 900   | 840 | 724 | 585 | 436 | 334 | 305 | 302 | 195 | 173 |
| <i>East of England</i>            | 1,215 | 867   | 755   | 705 | 543 | 428 | 426 | 297 | 166 | 208 | 198 | 223 |
| <i>South West</i>                 | 1,486 | 1,112 | 1,170 | 765 | 691 | 619 | 503 | 393 | 347 | 280 | 321 | 65  |
| <i>South Central</i>              | 1,247 | 850   | 825   | 687 | 528 | 474 | 457 | 359 | 274 | 202 | 300 | 155 |
| <i>London</i>                     | 1,202 | 916   | 881   | 765 | 660 | 553 | 478 | 292 | 248 | 312 | 164 | 228 |
| <i>South East Coast</i>           | 1,294 | 955   | 921   | 703 | 530 | 522 | 438 | 308 | 268 | 204 | 249 | 260 |
| <i>Northern Ireland</i>           | 1,672 | 1,368 | 1,092 | 901 | 611 | 704 | 692 | 361 | 361 | 354 | 418 | 371 |
| <i>Scotland</i>                   | 1,931 | 1,220 | 1,070 | 879 | 551 | 673 | 776 | 388 | 274 | 219 | 246 | 141 |
| <i>Wales</i>                      | 1,383 | 1,046 | 1,031 | 732 | 657 | 559 | 465 | 307 | 292 | 286 | 250 | 145 |

*Year*

|                 |       |       |       |     |     |     |     |     |     |     |     |     |
|-----------------|-------|-------|-------|-----|-----|-----|-----|-----|-----|-----|-----|-----|
| <i>2013/14</i>  | 1,442 | 1,067 | 987   | 852 | 573 | 605 | 630 | 441 | 298 | 233 | 232 | 196 |
| <i>2014/15</i>  | 1,438 | 1,042 | 990   | 763 | 596 | 578 | 537 | 370 | 307 | 257 | 249 | 189 |
| <i>2015/16</i>  | 1,483 | 1,070 | 1,011 | 765 | 641 | 589 | 502 | 303 | 322 | 281 | 262 | 190 |
| <i>2016/17</i>  | 1,504 | 1,066 | 1,025 | 755 | 675 | 591 | 439 | 284 | 304 | 310 | 264 | 182 |
| <i>2017/18</i>  | 1,523 | 1,067 | 1,029 | 738 | 708 | 590 | 395 | 280 | 305 | 327 | 276 | 165 |
| <i>% change</i> | 6     | 0     | 4     | -13 | 24  | -2  | -37 | -37 | 2   | 40  | 19  | -16 |

*Deprivation Quintile*

|                  |       |     |     |     |     |     |     |     |     |     |     |     |
|------------------|-------|-----|-----|-----|-----|-----|-----|-----|-----|-----|-----|-----|
| <i>1 - Least</i> | 1,295 | 928 | 881 | 742 | 581 | 539 | 421 | 311 | 250 | 245 | 231 | 191 |
| <i>2</i>         | 1,307 | 963 | 927 | 746 | 607 | 544 | 451 | 325 | 284 | 250 | 232 | 198 |

|          |       |       |       |     |     |     |     |     |     |     |     |     |
|----------|-------|-------|-------|-----|-----|-----|-----|-----|-----|-----|-----|-----|
| 3        | 1,340 | 984   | 962   | 755 | 646 | 544 | 436 | 338 | 315 | 260 | 247 | 182 |
| 4        | 1,339 | 999   | 988   | 767 | 694 | 578 | 437 | 359 | 319 | 290 | 236 | 186 |
| 5 - Most | 1,392 | 1,053 | 1,047 | 813 | 784 | 645 | 432 | 385 | 370 | 310 | 220 | 169 |
| Missing  | 1,549 | 1,111 | 1,016 | 798 | 613 | 605 | 578 | 347 | 299 | 268 | 262 | 182 |

*Ethnicity*

|         |       |       |       |       |       |     |     |     |     |     |     |     |
|---------|-------|-------|-------|-------|-------|-----|-----|-----|-----|-----|-----|-----|
| White   | 1,396 | 1,032 | 1,014 | 770   | 658   | 587 | 447 | 344 | 324 | 281 | 262 | 202 |
| Black   | 1,337 | 987   | 1,003 | 871   | 883   | 591 | 448 | 397 | 320 | 306 | 183 | 207 |
| Asian   | 1,592 | 1,248 | 1,250 | 1,033 | 1,141 | 774 | 506 | 533 | 418 | 508 | 246 | 273 |
| Other   | 1,338 | 1,026 | 991   | 873   | 836   | 613 | 470 | 388 | 325 | 307 | 206 | 203 |
| Missing | 1,483 | 1,062 | 969   | 781   | 600   | 582 | 552 | 337 | 285 | 255 | 245 | 172 |

*Time since diagnosis*

|           |       |       |       |     |     |     |     |     |     |     |     |     |
|-----------|-------|-------|-------|-----|-----|-----|-----|-----|-----|-----|-----|-----|
| < 1 year  | 1,614 | 1,112 | 1,001 | 831 | 555 | 600 | 601 | 348 | 312 | 258 | 261 | 208 |
| >= 1 year | 1,446 | 1,053 | 990   | 782 | 636 | 588 | 511 | 344 | 301 | 269 | 250 | 184 |

*Number of conditions*

|   |       |       |       |       |       |     |     |     |     |     |     |     |
|---|-------|-------|-------|-------|-------|-----|-----|-----|-----|-----|-----|-----|
| 1 | 1,183 | 910   | 855   | 658   | 380   | 501 | 482 | 161 | 264 | 220 | 233 | 175 |
| 2 | 1,827 | 1,295 | 1,196 | 998   | 1,052 | 735 | 579 | 645 | 355 | 339 | 276 | 201 |
| 3 | 2,817 | 1,607 | 1,525 | 1,285 | 1,685 | 899 | 609 | 891 | 482 | 483 | 325 | 209 |

*Region variation*

|                 |       |       |       |     |     |     |     |     |     |     |     |     |
|-----------------|-------|-------|-------|-----|-----|-----|-----|-----|-----|-----|-----|-----|
| 10th percentile | 1,215 | 850   | 755   | 657 | 530 | 474 | 318 | 297 | 237 | 176 | 155 | 129 |
| 90th percentile | 1,672 | 1,220 | 1,098 | 879 | 870 | 704 | 692 | 393 | 441 | 371 | 321 | 260 |
| 90/10 ratio     | 1.4   | 1.4   | 1.5   | 1.3 | 1.6 | 1.5 | 2.2 | 1.3 | 1.9 | 2.1 | 2.1 | 2.0 |

*GP practice variation*

|                                |       |       |       |       |      |      |      |      |      |      |      |       |
|--------------------------------|-------|-------|-------|-------|------|------|------|------|------|------|------|-------|
| <i>10th percentile</i>         | 1,068 | 703   | 623   | 572   | 423  | 319  | 178  | 216  | 119  | 129  | 109  | 1     |
| <i>90th percentile</i>         | 1,925 | 1,390 | 1,363 | 1,020 | 906  | 914  | 919  | 524  | 612  | 440  | 404  | 330   |
| <i>90/10 ratio</i>             | 1.8   | 2.0   | 2.2   | 1.8   | 2.1  | 2.9  | 5.2  | 2.4  | 5.1  | 3.4  | 3.7  | 318.0 |
| <i>% variation by region</i>   | 2.6   | 1.7   | 0.9   | 1.2   | 1.9  | 1.1  | 3.1  | 0.4  | 1.9  | 1.2  | 1.1  | 1.3   |
| <i>% variation by practice</i> | 3.2   | 7.3   | 6.6   | 8.8   | 6.9  | 14.4 | 25.5 | 7.8  | 24.3 | 10.2 | 4.4  | 6.0   |
| <i>% variation by person</i>   | 94.2  | 91.0  | 92.5  | 90.0  | 91.2 | 84.5 | 71.4 | 91.8 | 73.8 | 88.6 | 94.6 | 92.7  |

**Supplementary Table S11. Age-sex standardised testing rates (per 1,000 person years) by different characteristics for everyone with hypertension**

|                  | Renal Function tests | Liver Function tests | FBC     | Lipid Profile | HbA1c - diabetic control | Thyroid Function tests | Glucose | ACR / Microalbumin | Bone Profile | Haematinics | C Reactive protein | Erythrocyte sedimentation rate |
|------------------|----------------------|----------------------|---------|---------------|--------------------------|------------------------|---------|--------------------|--------------|-------------|--------------------|--------------------------------|
| Number tested    | 740,823              | 687,763              | 647,437 | 663,901       | 441,454                  | 541,505                | 530,962 | 306,994            | 359,029      | 315,264     | 299,927            | 226,340                        |
| % tested         | 91.4                 | 84.9                 | 79.9    | 81.9          | 54.5                     | 66.8                   | 65.5    | 37.9               | 44.3         | 38.9        | 37.0               | 27.9                           |
| <i>Sex</i>       |                      |                      |         |               |                          |                        |         |                    |              |             |                    |                                |
| Men              | 1,388                | 996                  | 897     | 786           | 590                      | 477                    | 516     | 306                | 259          | 221         | 206                | 145                            |
| Women            | 1,428                | 1,043                | 1,017   | 718           | 507                      | 637                    | 516     | 277                | 326          | 287         | 284                | 219                            |
| <i>Age Group</i> |                      |                      |         |               |                          |                        |         |                    |              |             |                    |                                |
| 0-49             | 917                  | 680                  | 625     | 524           | 378                      | 406                    | 369     | 134                | 179          | 172         | 164                | 120                            |
| 50-59            | 1,095                | 844                  | 725     | 678           | 490                      | 468                    | 451     | 189                | 210          | 181         | 192                | 145                            |
| 60-69            | 1,304                | 994                  | 854     | 796           | 570                      | 531                    | 520     | 265                | 249          | 203         | 219                | 164                            |
| 70-79            | 1,560                | 1,133                | 1,055   | 843           | 616                      | 604                    | 561     | 346                | 321          | 270         | 272                | 206                            |
| 80-89            | 1,775                | 1,197                | 1,255   | 772           | 582                      | 668                    | 575     | 399                | 413          | 372         | 319                | 236                            |
| 90+              | 1,644                | 1,049                | 1,234   | 563           | 403                      | 623                    | 500     | 333                | 415          | 398         | 302                | 194                            |
| <i>Region</i>    |                      |                      |         |               |                          |                        |         |                    |              |             |                    |                                |
| North East       | 1,568                | 1,133                | 987     | 810           | 681                      | 570                    | 583     | 341                | 389          | 174         | 239                | 212                            |



|                                   |       |       |       |     |     |     |     |     |     |     |     |     |
|-----------------------------------|-------|-------|-------|-----|-----|-----|-----|-----|-----|-----|-----|-----|
| <i>North West</i>                 | 1,363 | 1,046 | 1,053 | 816 | 790 | 668 | 331 | 336 | 425 | 343 | 224 | 200 |
| <i>Yorkshire &amp; the Humber</i> | 1,193 | 1,061 | 999   | 612 | 506 | 529 | 313 | 320 | 774 | 354 | 154 | 120 |
| <i>East Midlands</i>              | 1,305 | 792   | 560   | 568 | 778 | 424 | 85  | 303 | 231 | 151 | 112 | 133 |
| <i>West Midlands</i>              | 1,313 | 981   | 869   | 796 | 641 | 546 | 428 | 276 | 301 | 288 | 194 | 171 |
| <i>East of England</i>            | 1,177 | 830   | 736   | 669 | 460 | 413 | 419 | 245 | 164 | 203 | 195 | 220 |
| <i>South West</i>                 | 1,441 | 1,062 | 1,123 | 727 | 606 | 586 | 503 | 338 | 337 | 266 | 312 | 64  |
| <i>South Central</i>              | 1,200 | 803   | 793   | 644 | 428 | 442 | 463 | 295 | 263 | 191 | 296 | 154 |
| <i>London</i>                     | 1,169 | 885   | 857   | 732 | 583 | 532 | 479 | 241 | 244 | 299 | 162 | 225 |
| <i>South East Coast</i>           | 1,255 | 913   | 888   | 665 | 451 | 496 | 439 | 258 | 262 | 197 | 243 | 254 |
| <i>Northern Ireland</i>           | 1,617 | 1,326 | 1,058 | 851 | 517 | 663 | 658 | 304 | 348 | 339 | 407 | 365 |
| <i>Scotland</i>                   | 1,836 | 1,182 | 1,038 | 840 | 432 | 634 | 793 | 326 | 268 | 210 | 241 | 139 |
| <i>Wales</i>                      | 1,351 | 1,016 | 1,005 | 704 | 584 | 537 | 456 | 263 | 286 | 272 | 246 | 144 |

*Year*

|                 |       |       |     |     |     |     |     |     |     |     |     |     |
|-----------------|-------|-------|-----|-----|-----|-----|-----|-----|-----|-----|-----|-----|
| <i>2013/14</i>  | 1,397 | 1,027 | 955 | 816 | 482 | 576 | 628 | 372 | 289 | 223 | 227 | 192 |
| <i>2014/15</i>  | 1,389 | 1,004 | 958 | 726 | 510 | 550 | 536 | 314 | 299 | 246 | 244 | 187 |
| <i>2015/16</i>  | 1,435 | 1,032 | 980 | 729 | 559 | 559 | 502 | 257 | 314 | 268 | 258 | 187 |
| <i>2016/17</i>  | 1,457 | 1,030 | 993 | 721 | 596 | 561 | 439 | 241 | 298 | 295 | 258 | 179 |
| <i>2017/18</i>  | 1,475 | 1,033 | 998 | 706 | 633 | 561 | 395 | 239 | 298 | 311 | 271 | 162 |
| <i>% change</i> | 6     | 1     | 5   | -13 | 31  | -3  | -37 | -36 | 3   | 40  | 19  | -16 |

*Deprivation Quintile*

|                  |       |     |     |     |     |     |     |     |     |     |     |     |
|------------------|-------|-----|-----|-----|-----|-----|-----|-----|-----|-----|-----|-----|
| <i>1 - Least</i> | 1,256 | 887 | 848 | 707 | 505 | 510 | 424 | 255 | 246 | 231 | 226 | 188 |
| <i>2</i>         | 1,269 | 923 | 896 | 709 | 525 | 516 | 454 | 270 | 278 | 239 | 227 | 196 |

|          |       |       |       |     |     |     |     |     |     |     |     |     |
|----------|-------|-------|-------|-----|-----|-----|-----|-----|-----|-----|-----|-----|
| 3        | 1,302 | 942   | 927   | 719 | 566 | 515 | 438 | 285 | 306 | 249 | 242 | 179 |
| 4        | 1,301 | 959   | 955   | 728 | 609 | 549 | 438 | 304 | 311 | 276 | 231 | 183 |
| 5 - Most | 1,353 | 1,013 | 1,013 | 771 | 696 | 614 | 430 | 329 | 362 | 294 | 217 | 167 |
| Missing  | 1,491 | 1,073 | 984   | 760 | 521 | 573 | 574 | 292 | 291 | 256 | 257 | 179 |

*Ethnicity*

|         |       |       |       |     |       |     |     |     |     |     |     |     |
|---------|-------|-------|-------|-----|-------|-----|-----|-----|-----|-----|-----|-----|
| White   | 1,358 | 992   | 980   | 733 | 578   | 558 | 449 | 290 | 317 | 268 | 257 | 199 |
| Black   | 1,317 | 967   | 991   | 841 | 821   | 577 | 450 | 358 | 320 | 302 | 183 | 208 |
| Asian   | 1,561 | 1,207 | 1,223 | 984 | 1,032 | 748 | 517 | 456 | 415 | 493 | 244 | 278 |
| Other   | 1,305 | 989   | 971   | 829 | 738   | 584 | 469 | 323 | 322 | 300 | 209 | 207 |
| Missing | 1,427 | 1,024 | 937   | 743 | 510   | 551 | 549 | 283 | 277 | 242 | 240 | 170 |

*Time since diagnosis*

|           |       |       |     |     |     |     |     |     |     |     |     |     |
|-----------|-------|-------|-----|-----|-----|-----|-----|-----|-----|-----|-----|-----|
| < 1 year  | 1,633 | 1,076 | 979 | 808 | 467 | 581 | 574 | 260 | 306 | 250 | 252 | 200 |
| >= 1 year | 1,392 | 1,013 | 956 | 743 | 547 | 556 | 511 | 290 | 293 | 256 | 245 | 181 |

*Number of conditions*

|   |       |       |       |       |       |     |     |     |     |     |     |     |
|---|-------|-------|-------|-------|-------|-----|-----|-----|-----|-----|-----|-----|
| 1 | 1,088 | 842   | 796   | 596   | 236   | 450 | 478 | 63  | 249 | 196 | 224 | 171 |
| 2 | 1,798 | 1,279 | 1,182 | 984   | 1,021 | 724 | 578 | 629 | 352 | 334 | 274 | 200 |
| 3 | 2,827 | 1,606 | 1,527 | 1,285 | 1,685 | 896 | 608 | 888 | 484 | 483 | 326 | 209 |

*Region variation*

|                 |       |       |       |     |     |     |     |     |     |     |     |     |
|-----------------|-------|-------|-------|-----|-----|-----|-----|-----|-----|-----|-----|-----|
| 10th percentile | 1,177 | 803   | 736   | 612 | 432 | 424 | 313 | 245 | 231 | 174 | 154 | 120 |
| 90th percentile | 1,617 | 1,182 | 1,058 | 840 | 778 | 663 | 658 | 338 | 425 | 343 | 312 | 254 |
| 90/10 ratio     | 1.4   | 1.5   | 1.4   | 1.4 | 1.8 | 1.6 | 2.1 | 1.4 | 1.8 | 2.0 | 2.0 | 2.1 |

*GP practice variation*

|                                |       |       |       |      |      |      |      |      |      |      |      |       |
|--------------------------------|-------|-------|-------|------|------|------|------|------|------|------|------|-------|
| <i>10th percentile</i>         | 1,012 | 679   | 616   | 521  | 317  | 307  | 175  | 173  | 118  | 123  | 104  | 1     |
| <i>90th percentile</i>         | 1,837 | 1,347 | 1,323 | 979  | 831  | 876  | 931  | 440  | 589  | 413  | 398  | 323   |
| <i>90/10 ratio</i>             | 1.8   | 2.0   | 2.1   | 1.9  | 2.6  | 2.9  | 5.3  | 2.5  | 5.0  | 3.4  | 3.8  | 384.0 |
| <i>% variation by region</i>   | 2.4   | 1.7   | 0.9   | 1.1  | 3.5  | 1.0  | 3.5  | 0.3  | 1.8  | 1.2  | 1.0  | 1.2   |
| <i>% variation by practice</i> | 3.7   | 7.5   | 6.4   | 9.8  | 11.6 | 14.7 | 26.3 | 7.0  | 23.4 | 9.1  | 4.3  | 5.9   |
| <i>% variation by person</i>   | 93.9  | 90.9  | 92.7  | 89.0 | 84.9 | 84.3 | 70.2 | 92.7 | 74.9 | 89.7 | 94.7 | 92.9  |

**Supplementary Table S12. Age-sex standardised testing rates (per 1,000 person years) by different characteristics for everyone with diabetes**

| Test             | Renal Function tests | Liver Function tests | FBC     | Lipid Profile | HbA1c - diabetic control | Thyroid Function tests | Glucose | ACR / Microalbumin | Bone Profile | Haematinics | C Reactive protein | Erythrocyte sedimentation rate |
|------------------|----------------------|----------------------|---------|---------------|--------------------------|------------------------|---------|--------------------|--------------|-------------|--------------------|--------------------------------|
| Number tested    | 259,949              | 251,150              | 232,042 | 256,271       | 258,571                  | 215,056                | 161,669 | 229,781            | 124,106      | 130,701     | 100,531            | 74,352                         |
| % tested         | 97.7                 | 94.4                 | 87.2    | 96.3          | 97.1                     | 80.8                   | 60.7    | 86.3               | 46.6         | 49.1        | 37.8               | 27.9                           |
| <i>Sex</i>       |                      |                      |         |               |                          |                        |         |                    |              |             |                    |                                |
| Men              | 2,016                | 1,407                | 1,192   | 1,238         | 1,656                    | 786                    | 523     | 876                | 311          | 352         | 212                | 143                            |
| Women            | 2,122                | 1,498                | 1,357   | 1,231         | 1,651                    | 948                    | 538     | 840                | 384          | 438         | 293                | 216                            |
| <i>Age Group</i> |                      |                      |         |               |                          |                        |         |                    |              |             |                    |                                |
| 0-49             | 1,516                | 1,120                | 910     | 1,097         | 1,489                    | 722                    | 441     | 601                | 228          | 272         | 174                | 117                            |
| 50-59            | 1,736                | 1,334                | 1,061   | 1,224         | 1,629                    | 803                    | 495     | 759                | 279          | 311         | 208                | 149                            |
| 60-69            | 1,985                | 1,453                | 1,195   | 1,283         | 1,714                    | 854                    | 528     | 892                | 310          | 355         | 226                | 162                            |
| 70-79            | 2,280                | 1,564                | 1,401   | 1,293         | 1,735                    | 908                    | 556     | 977                | 380          | 438         | 275                | 199                            |
| 80-89            | 2,513                | 1,599                | 1,568   | 1,219         | 1,629                    | 928                    | 582     | 939                | 462          | 514         | 318                | 224                            |
| 90+              | 2,373                | 1,440                | 1,533   | 1,004         | 1,357                    | 856                    | 560     | 744                | 457          | 498         | 315                | 190                            |
| <i>Region</i>    |                      |                      |         |               |                          |                        |         |                    |              |             |                    |                                |
| North East       | 2,032                | 1,716                | 1,446   | 1,379         | 1,723                    | 989                    | 464     | 835                | 588          | 217         | 257                | 198                            |

|                                   |       |       |       |       |       |       |       |     |     |     |     |     |
|-----------------------------------|-------|-------|-------|-------|-------|-------|-------|-----|-----|-----|-----|-----|
| <i>North West</i>                 | 1,884 | 1,489 | 1,526 | 1,271 | 1,698 | 1,031 | 351   | 918 | 556 | 618 | 243 | 200 |
| <i>Yorkshire &amp; the Humber</i> | 1,645 | 1,465 | 1,374 | 1,054 | 1,429 | 791   | 232   | 963 | 982 | 589 | 151 | 141 |
| <i>East Midlands</i>              | 1,879 | 1,205 | 577   | 884   | 1,656 | 917   | 104   | 811 | 225 | 196 | 116 | 131 |
| <i>West Midlands</i>              | 1,867 | 1,510 | 1,200 | 1,362 | 1,670 | 935   | 537   | 827 | 372 | 463 | 191 | 171 |
| <i>East of England</i>            | 1,740 | 1,276 | 957   | 1,168 | 1,569 | 558   | 479   | 841 | 185 | 286 | 215 | 225 |
| <i>South West</i>                 | 1,946 | 1,528 | 1,557 | 1,178 | 1,691 | 860   | 494   | 854 | 370 | 418 | 337 | 60  |
| <i>South Central</i>              | 1,755 | 1,300 | 1,115 | 1,167 | 1,636 | 783   | 402   | 946 | 372 | 306 | 307 | 149 |
| <i>London</i>                     | 1,644 | 1,262 | 1,154 | 1,159 | 1,525 | 745   | 491   | 750 | 287 | 457 | 171 | 237 |
| <i>South East Coast</i>           | 1,808 | 1,396 | 1,220 | 1,195 | 1,484 | 783   | 447   | 770 | 307 | 283 | 246 | 242 |
| <i>Northern Ireland</i>           | 2,343 | 1,897 | 1,394 | 1,475 | 1,717 | 1,046 | 1,097 | 941 | 450 | 491 | 453 | 367 |
| <i>Scotland</i>                   | 3,306 | 1,592 | 1,310 | 1,335 | 1,829 | 1,036 | 628   | 942 | 278 | 298 | 251 | 146 |
| <i>Wales</i>                      | 1,875 | 1,407 | 1,336 | 1,116 | 1,599 | 794   | 556   | 823 | 343 | 438 | 262 | 146 |

*Year*

|                 |       |       |       |       |       |     |     |       |     |     |     |     |
|-----------------|-------|-------|-------|-------|-------|-----|-----|-------|-----|-----|-----|-----|
| <i>2013/14</i>  | 2,000 | 1,480 | 1,271 | 1,306 | 1,700 | 891 | 652 | 1,047 | 352 | 340 | 234 | 189 |
| <i>2014/15</i>  | 2,078 | 1,449 | 1,289 | 1,223 | 1,634 | 860 | 556 | 878   | 365 | 378 | 254 | 186 |
| <i>2015/16</i>  | 2,161 | 1,484 | 1,325 | 1,219 | 1,642 | 875 | 519 | 804   | 383 | 418 | 271 | 190 |
| <i>2016/17</i>  | 2,191 | 1,457 | 1,337 | 1,186 | 1,613 | 866 | 457 | 752   | 348 | 464 | 274 | 180 |
| <i>2017/18</i>  | 2,228 | 1,451 | 1,336 | 1,154 | 1,599 | 864 | 419 | 734   | 350 | 491 | 284 | 164 |
| <i>% change</i> | 11    | -2    | 5     | -12   | -6    | -3  | -36 | -30   | -1  | 44  | 21  | -13 |

*Deprivation Quintile*

|                  |       |       |       |       |       |     |     |     |     |     |     |     |
|------------------|-------|-------|-------|-------|-------|-----|-----|-----|-----|-----|-----|-----|
| <i>1 - Least</i> | 1,801 | 1,396 | 1,201 | 1,209 | 1,608 | 845 | 400 | 868 | 288 | 409 | 239 | 192 |
| <i>2</i>         | 1,793 | 1,387 | 1,224 | 1,201 | 1,596 | 811 | 441 | 842 | 341 | 384 | 237 | 194 |

|          |       |       |       |       |       |     |     |     |     |     |     |     |
|----------|-------|-------|-------|-------|-------|-----|-----|-----|-----|-----|-----|-----|
| 3        | 1,827 | 1,398 | 1,292 | 1,205 | 1,607 | 808 | 431 | 842 | 383 | 383 | 249 | 180 |
| 4        | 1,785 | 1,371 | 1,279 | 1,186 | 1,583 | 820 | 441 | 821 | 377 | 426 | 245 | 189 |
| 5 - Most | 1,827 | 1,400 | 1,351 | 1,214 | 1,616 | 891 | 440 | 795 | 435 | 442 | 225 | 165 |
| Missing  | 2,329 | 1,513 | 1,308 | 1,250 | 1,681 | 898 | 618 | 879 | 346 | 395 | 270 | 179 |

*Ethnicity*

|         |       |       |       |       |       |     |     |     |     |     |     |     |
|---------|-------|-------|-------|-------|-------|-----|-----|-----|-----|-----|-----|-----|
| White   | 1,873 | 1,439 | 1,324 | 1,209 | 1,617 | 857 | 437 | 837 | 383 | 418 | 265 | 193 |
| Black   | 1,722 | 1,253 | 1,198 | 1,216 | 1,602 | 765 | 423 | 779 | 340 | 372 | 181 | 212 |
| Asian   | 1,840 | 1,443 | 1,395 | 1,267 | 1,674 | 893 | 472 | 837 | 435 | 580 | 238 | 254 |
| Other   | 1,696 | 1,308 | 1,196 | 1,221 | 1,582 | 795 | 446 | 805 | 375 | 406 | 199 | 195 |
| Missing | 2,243 | 1,475 | 1,270 | 1,237 | 1,660 | 878 | 592 | 872 | 334 | 384 | 255 | 172 |

*Time since diagnosis*

|           |       |       |       |       |       |     |     |       |     |     |     |     |
|-----------|-------|-------|-------|-------|-------|-----|-----|-------|-----|-----|-----|-----|
| < 1 year  | 2,119 | 1,588 | 1,281 | 1,356 | 1,893 | 895 | 736 | 1,033 | 359 | 357 | 279 | 205 |
| >= 1 year | 2,102 | 1,458 | 1,299 | 1,228 | 1,640 | 873 | 522 | 852   | 356 | 407 | 257 | 182 |

*Number of conditions*

|   |       |       |       |       |       |     |     |     |     |     |     |     |
|---|-------|-------|-------|-------|-------|-----|-----|-----|-----|-----|-----|-----|
| 1 | 1,791 | 1,376 | 1,183 | 1,184 | 1,586 | 845 | 520 | 799 | 316 | 366 | 239 | 173 |
| 2 | 1,983 | 1,439 | 1,251 | 1,225 | 1,638 | 860 | 530 | 852 | 333 | 387 | 246 | 179 |
| 3 | 2,891 | 1,628 | 1,541 | 1,314 | 1,761 | 913 | 571 | 925 | 483 | 495 | 323 | 203 |

*Region variation*

|                 |       |       |       |       |       |       |     |     |     |     |     |     |
|-----------------|-------|-------|-------|-------|-------|-------|-----|-----|-----|-----|-----|-----|
| 10th percentile | 1,645 | 1,262 | 957   | 1,054 | 1,484 | 745   | 232 | 770 | 225 | 217 | 151 | 131 |
| 90th percentile | 2,343 | 1,716 | 1,526 | 1,379 | 1,723 | 1,036 | 628 | 946 | 588 | 589 | 337 | 242 |
| 90/10 ratio     | 1.4   | 1.4   | 1.6   | 1.3   | 1.2   | 1.4   | 2.7 | 1.2 | 2.6 | 2.7 | 2.2 | 1.8 |

*GP practice variation*

|                                |       |       |       |       |       |       |       |       |      |      |      |       |
|--------------------------------|-------|-------|-------|-------|-------|-------|-------|-------|------|------|------|-------|
| <i>10th percentile</i>         | 1,489 | 1,022 | 683   | 987   | 1,341 | 345   | 115   | 619   | 121  | 162  | 109  | 1     |
| <i>90th percentile</i>         | 3,076 | 1,919 | 1,839 | 1,579 | 2,000 | 1,327 | 1,355 | 1,116 | 838  | 781  | 432  | 337   |
| <i>90/10 ratio</i>             | 2.1   | 1.9   | 2.7   | 1.6   | 1.5   | 3.9   | 11.7  | 1.8   | 6.9  | 4.8  | 4.0  | 372.5 |
| <i>% variation by region</i>   | 5.8   | 2.1   | 1.3   | 2.6   | 1.5   | 2.4   | 3.3   | 0.7   | 2.5  | 1.7  | 1.3  | 1.3   |
| <i>% variation by practice</i> | 4.7   | 14.3  | 15.5  | 13.7  | 9.7   | 34.3  | 56.1  | 15.4  | 43.7 | 27.1 | 6.3  | 8.0   |
| <i>% variation by person</i>   | 89.4  | 83.5  | 83.2  | 83.8  | 88.8  | 63.3  | 40.6  | 84.0  | 53.8 | 71.3 | 92.4 | 90.7  |

**Supplementary Table S13. Age-sex standardised testing rates (per 1,000 person years) by different characteristics for everyone with CKD**

| Test              | Renal Function tests | Liver Function tests | FBC     | Lipid Profile | HbA1c - diabetic control | Thyroid Function tests | Glucose | ACR / Microalbumin | Bone Profile | Haematinics | C Reactive protein | Erythrocyte sedimentation rate |
|-------------------|----------------------|----------------------|---------|---------------|--------------------------|------------------------|---------|--------------------|--------------|-------------|--------------------|--------------------------------|
| Number tested     | 203,011              | 191,822              | 187,723 | 177,403       | 125,957                  | 157,578                | 144,902 | 160,765            | 121,088      | 110,772     | 98,401             | 71,100                         |
| % tested          | 95.8                 | 90.5                 | 88.6    | 83.7          | 59.4                     | 74.4                   | 68.4    | 75.9               | 57.1         | 52.3        | 46.4               | 33.5                           |
| <i>Sex</i>        |                      |                      |         |               |                          |                        |         |                    |              |             |                    |                                |
| <i>Men</i>        | 2,092                | 1,276                | 1,323   | 875           | 737                      | 612                    | 573     | 653                | 427          | 371         | 309                | 201                            |
| <i>Women</i>      | 1,939                | 1,270                | 1,343   | 769           | 598                      | 760                    | 562     | 579                | 459          | 394         | 372                | 273                            |
| <i>Age Group</i>  |                      |                      |         |               |                          |                        |         |                    |              |             |                    |                                |
| <i>0-49</i>       | 1,531                | 882                  | 965     | 537           | 400                      | 429                    | 376     | 319                | 382          | 258         | 276                | 160                            |
| <i>50-59</i>      | 1,637                | 1,071                | 1,054   | 706           | 567                      | 609                    | 475     | 444                | 378          | 278         | 306                | 212                            |
| <i>60-69</i>      | 1,870                | 1,238                | 1,180   | 863           | 698                      | 675                    | 547     | 576                | 389          | 303         | 327                | 229                            |
| <i>70-79</i>      | 2,068                | 1,336                | 1,336   | 908           | 748                      | 721                    | 587     | 666                | 433          | 366         | 354                | 259                            |
| <i>80-89</i>      | 2,134                | 1,337                | 1,458   | 818           | 660                      | 740                    | 600     | 654                | 492          | 443         | 367                | 263                            |
| <i>90+</i>        | 1,888                | 1,149                | 1,381   | 603           | 446                      | 671                    | 525     | 519                | 465          | 444         | 335                | 206                            |
| <i>Region</i>     |                      |                      |         |               |                          |                        |         |                    |              |             |                    |                                |
| <i>North East</i> | 2,140                | 1,455                | 1,382   | 854           | 739                      | 618                    | 554     | 652                | 675          | 233         | 304                | 278                            |



|                                   |       |       |       |     |     |     |     |     |       |     |     |     |
|-----------------------------------|-------|-------|-------|-----|-----|-----|-----|-----|-------|-----|-----|-----|
| <i>North West</i>                 | 1,837 | 1,269 | 1,358 | 895 | 933 | 792 | 351 | 671 | 613   | 495 | 302 | 245 |
| <i>Yorkshire &amp; the Humber</i> | 1,828 | 1,439 | 1,323 | 766 | 543 | 518 | 388 | 634 | 1,026 | 455 | 213 | 164 |
| <i>East Midlands</i>              | 2,027 | 991   | 944   | 563 | 888 | 500 | 125 | 699 | 565   | 210 | 190 | 188 |
| <i>West Midlands</i>              | 1,662 | 1,116 | 1,098 | 840 | 722 | 646 | 447 | 571 | 378   | 383 | 239 | 204 |
| <i>East of England</i>            | 1,645 | 1,029 | 972   | 727 | 604 | 480 | 442 | 615 | 250   | 261 | 272 | 271 |
| <i>South West</i>                 | 1,893 | 1,331 | 1,434 | 775 | 674 | 717 | 546 | 634 | 537   | 353 | 398 | 74  |
| <i>South Central</i>              | 1,682 | 1,034 | 1,086 | 698 | 520 | 524 | 519 | 637 | 400   | 268 | 415 | 195 |
| <i>London</i>                     | 1,459 | 1,003 | 1,028 | 764 | 671 | 585 | 479 | 507 | 319   | 361 | 211 | 275 |
| <i>South East Coast</i>           | 1,538 | 1,049 | 1,087 | 682 | 506 | 558 | 432 | 479 | 329   | 239 | 322 | 316 |
| <i>Northern Ireland</i>           | 2,171 | 1,590 | 1,347 | 948 | 621 | 800 | 756 | 515 | 417   | 433 | 539 | 456 |
| <i>Scotland</i>                   | 2,843 | 1,414 | 1,421 | 933 | 610 | 741 | 823 | 702 | 459   | 298 | 323 | 175 |
| <i>Wales</i>                      | 1,768 | 1,170 | 1,257 | 737 | 675 | 614 | 462 | 432 | 382   | 363 | 312 | 165 |

*Year*

|                 |       |       |       |     |     |     |     |     |     |     |     |     |
|-----------------|-------|-------|-------|-----|-----|-----|-----|-----|-----|-----|-----|-----|
| <i>2013/14</i>  | 1,887 | 1,239 | 1,245 | 892 | 589 | 676 | 666 | 805 | 420 | 298 | 304 | 240 |
| <i>2014/15</i>  | 1,882 | 1,204 | 1,236 | 789 | 614 | 644 | 569 | 690 | 425 | 324 | 321 | 230 |
| <i>2015/16</i>  | 1,923 | 1,222 | 1,237 | 777 | 655 | 648 | 529 | 456 | 434 | 348 | 335 | 228 |
| <i>2016/17</i>  | 1,935 | 1,199 | 1,251 | 763 | 691 | 650 | 456 | 396 | 403 | 381 | 339 | 221 |
| <i>2017/18</i>  | 1,967 | 1,206 | 1,252 | 752 | 727 | 654 | 411 | 389 | 417 | 405 | 352 | 202 |
| <i>% change</i> | 4     | -3    | 1     | -16 | 23  | -3  | -38 | -52 | -1  | 36  | 16  | -16 |

*Deprivation Quintile*

|                  |       |       |       |     |     |     |     |     |     |     |     |     |
|------------------|-------|-------|-------|-----|-----|-----|-----|-----|-----|-----|-----|-----|
| <i>1 - Least</i> | 1,673 | 1,078 | 1,109 | 743 | 579 | 593 | 448 | 589 | 357 | 305 | 313 | 232 |
| <i>2</i>         | 1,690 | 1,126 | 1,175 | 756 | 612 | 616 | 472 | 576 | 394 | 318 | 315 | 245 |

|          |       |       |       |     |     |     |     |     |     |     |     |     |
|----------|-------|-------|-------|-----|-----|-----|-----|-----|-----|-----|-----|-----|
| 3        | 1,717 | 1,134 | 1,202 | 748 | 633 | 586 | 449 | 570 | 431 | 319 | 324 | 222 |
| 4        | 1,677 | 1,136 | 1,192 | 777 | 691 | 632 | 471 | 580 | 415 | 353 | 303 | 222 |
| 5 - Most | 1,735 | 1,192 | 1,247 | 821 | 777 | 693 | 456 | 592 | 482 | 366 | 287 | 190 |
| Missing  | 2,074 | 1,274 | 1,274 | 825 | 642 | 675 | 600 | 553 | 422 | 348 | 340 | 226 |

*Ethnicity*

|         |       |       |       |     |       |     |     |     |     |     |     |     |
|---------|-------|-------|-------|-----|-------|-----|-----|-----|-----|-----|-----|-----|
| White   | 1,765 | 1,175 | 1,237 | 768 | 654   | 637 | 466 | 581 | 434 | 345 | 335 | 238 |
| Black   | 1,644 | 1,092 | 1,167 | 887 | 899   | 600 | 465 | 620 | 436 | 354 | 242 | 195 |
| Asian   | 1,970 | 1,358 | 1,445 | 986 | 1,093 | 762 | 508 | 696 | 517 | 526 | 306 | 281 |
| Other   | 1,639 | 1,122 | 1,175 | 875 | 838   | 627 | 473 | 607 | 419 | 365 | 246 | 214 |
| Missing | 1,996 | 1,231 | 1,227 | 812 | 628   | 657 | 581 | 551 | 405 | 333 | 324 | 217 |

*Time since diagnosis*

|           |       |       |       |     |     |     |     |     |     |     |     |     |
|-----------|-------|-------|-------|-----|-----|-----|-----|-----|-----|-----|-----|-----|
| < 1 year  | 2,271 | 1,323 | 1,357 | 802 | 648 | 680 | 574 | 719 | 451 | 395 | 369 | 265 |
| >= 1 year | 1,876 | 1,204 | 1,226 | 803 | 650 | 650 | 535 | 553 | 417 | 336 | 324 | 223 |

*Number of conditions*

|   |       |       |       |       |       |     |     |     |     |     |     |     |
|---|-------|-------|-------|-------|-------|-----|-----|-----|-----|-----|-----|-----|
| 1 | 1,384 | 1,001 | 1,071 | 546   | 231   | 570 | 455 | 387 | 377 | 289 | 344 | 246 |
| 2 | 1,756 | 1,142 | 1,183 | 722   | 395   | 583 | 554 | 501 | 411 | 301 | 319 | 224 |
| 3 | 2,835 | 1,595 | 1,527 | 1,271 | 1,677 | 883 | 590 | 892 | 493 | 482 | 327 | 205 |

*Region variation*

|                 |       |       |       |     |     |     |     |     |     |     |     |     |
|-----------------|-------|-------|-------|-----|-----|-----|-----|-----|-----|-----|-----|-----|
| 10th percentile | 1,538 | 1,003 | 972   | 682 | 520 | 500 | 351 | 479 | 319 | 233 | 211 | 164 |
| 90th percentile | 2,171 | 1,455 | 1,421 | 933 | 888 | 792 | 756 | 699 | 675 | 455 | 415 | 316 |
| 90/10 ratio     | 1.4   | 1.5   | 1.5   | 1.4 | 1.7 | 1.6 | 2.2 | 1.5 | 2.1 | 2.0 | 2.0 | 1.9 |

*GP practice variation*

|                                |       |       |       |       |      |      |      |      |      |      |      |      |
|--------------------------------|-------|-------|-------|-------|------|------|------|------|------|------|------|------|
| <i>10th percentile</i>         | 1,317 | 807   | 787   | 565   | 400  | 364  | 182  | 350  | 163  | 164  | 121  | 0    |
| <i>90th percentile</i>         | 2,800 | 1,606 | 1,692 | 1,040 | 957  | 970  | 924  | 862  | 836  | 527  | 555  | 423  |
| <i>90/10 ratio</i>             | 2.1   | 2.0   | 2.2   | 1.8   | 2.4  | 2.7  | 5.1  | 2.5  | 5.1  | 3.2  | 4.6  | n/a  |
| <i>% variation by region</i>   | 3.5   | 2.1   | 1.4   | 1.6   | 2.9  | 1.2  | 3.3  | 2.6  | 2.6  | 1.2  | 1.4  | 1.4  |
| <i>% variation by practice</i> | 4.0   | 7.7   | 6.3   | 9.6   | 10.3 | 11.9 | 26.1 | 15.2 | 21.7 | 10.5 | 6.0  | 7.1  |
| <i>% variation by person</i>   | 92.5  | 90.2  | 92.3  | 88.8  | 86.8 | 87.0 | 70.6 | 82.1 | 75.8 | 88.3 | 92.6 | 91.6 |

### **Supplementary Box S1. Included tests, test panels, and testing rates**

CPRD records over 300 categories of tests; we excluded those unrelated to laboratory testing to monitor LTC, e.g. lung function after bronchodilation (Supplementary Figure S1). Test results are recorded separately in CPRD even if requested as a 'panel'. For example, red and white blood cell counts are recorded separately as part of a full blood count. Results from the same test panel for the same person and date were grouped as one test request<sup>1</sup> (Supplementary Table S5). To focus on common tests, we excluded tests ordered less than once in every 10 years per person.

Whilst CPRD collects information from GP practice records, hospital test results might also be recorded. Additionally, some test categories are not specific enough to be of interest (e.g. miscellaneous). Inclusion/exclusion decisions for the remaining test panels were made independently by two clinicians (JW and KA), with a final consensus decision following discussion of discrepancies. Supplementary Figure S1 shows the inclusion/exclusion process, with 12 tests included in the analysis: renal function, liver function, full blood count (FBC), lipid profile, HbA1c, thyroid function, blood glucose, albumin-to-creatinine ratio (ACR)/microalbumin, bone profile, haematinics, C-reactive protein, and erythrocyte sedimentation rate (ESR).

Crude testing rates were calculated by dividing the number of tests ordered by the person-years of follow-up. People may have multiple registration periods if they moved between CPRD practices – only the most recent period of registration was considered. A person's 'index date' was their earliest diagnosis of one of the three LTC. For condition-specific analyses, the index date was the diagnosis of that condition.

Follow-up to ascertain testing rates started at the latest of practice up-to-standard date (an indication of reasonable data quality), current registration at practice, index date, or study start (1<sup>st</sup> June 2013). Follow-up ended at the earliest of transfer out from practice, death, last data collection date, or study end (31<sup>st</sup> May 2018).

Age-sex standardised testing rates were estimated using direct standardisation.<sup>15</sup> The whole cohort included in our study was used as our standard population, to be representative of people with LTC. We produced age-sex specific counts of tests by summing the number of tests, grouped by sex and age group. Similarly, person years of follow-up were summed by sex, and age group. Age-sex-specific testing rates were calculated by dividing the age-sex specific test counts by the equivalent age-sex-specific person years. We weighted the age-sex-specific rates according to the standard population distribution, to produce directly standardised rates which are more comparable.
